# Supplementary material for: Facile Assembling of Novel 2,3,6,7,9-pentaazabicyclo- [3.3.1]nona-3,7-diene Derivatives under Microwave and Ultrasound Platforms
Source: PubMed Central journal article supplement (PMC6471913; doi:10.3390/molecules24061110), 2019-03-20

## Supporting Information on

# Facile assembling of novel 2,3,6,7,9-pentaazabicyclo[3.3.1]nona-3,7-diene derivatives under microwave and ultrasound platforms

Hamad M. Al-Matar<sup>a\*</sup>, Kamal M. Dawood<sup>b</sup>, Wael M. Tohamy<sup>c</sup> and Mona A. Shalaby<sup>a</sup>

<sup>1</sup>H NMR spectrum of compound 2a

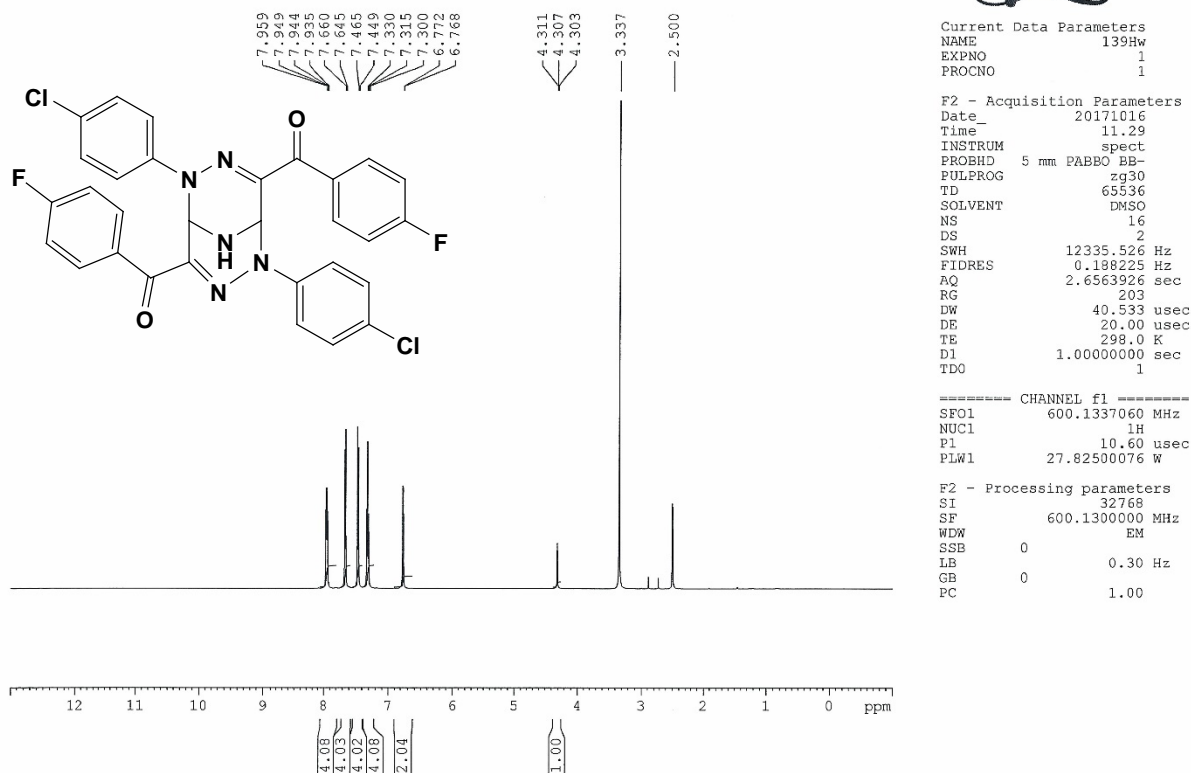

<sup>13</sup>C NMR spectrum of compound 2a

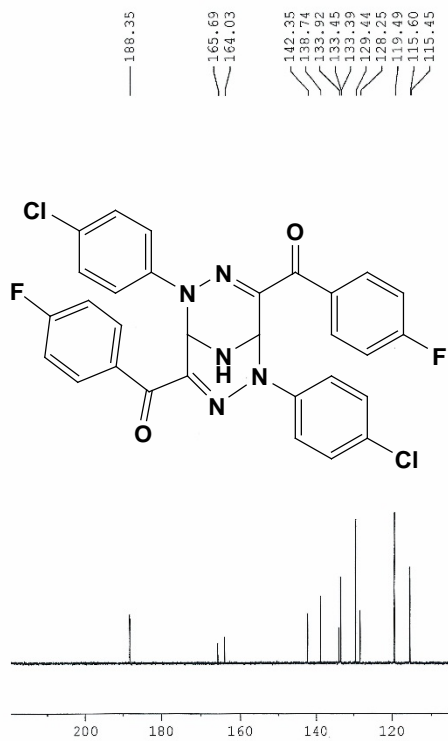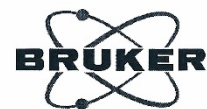

Current Data Parameters  
 NAME 139fw  
 EXPNO 2  
 PROCNO 1

F2 - Acquisition Parameters  
 Date\_ 20171016  
 Time\_ 12.33  
 INSTRUM spect  
 PROBHD 5 mm PABEO BB-  
 PULPROG zgpg30  
 TD 65536  
 SOLVENT DMSO  
 NS 1374  
 DS 4  
 SWH 36057.691 Hz  
 FIDRES 0.550197 Hz  
 AQ 0.9087659 sec  
 RG 203  
 DW 13.867 usec  
 DE 50.00 usec  
 TE 298.0 K  
 D1 2.0000000 sec  
 D11 0.0300000 sec  
 TDO 1

===== CHANNEL f1 =====  
 SFO1 150.9178979 MHz  
 NUC1 13C  
 P1 8.80 usec  
 PLW1 78.13500214 W

===== CHANNEL f2 =====  
 SFO2 600.1324005 MHz  
 NUC2 1H  
 CPDPRG[2] waltz65  
 PCPD2 70.00 usec  
 PLW2 27.82500076 W  
 PLW12 0.63804001 W  
 PLW13 0.31264001 W

F2 - Processing parameters  
 SI 32768  
 SF 150.9028090 MHz  
 WDW EM  
 SSB 0  
 LB 1.00 Hz  
 GB 0  
 PC 1.40

<sup>1</sup>H NMR spectrum of compound **2b**

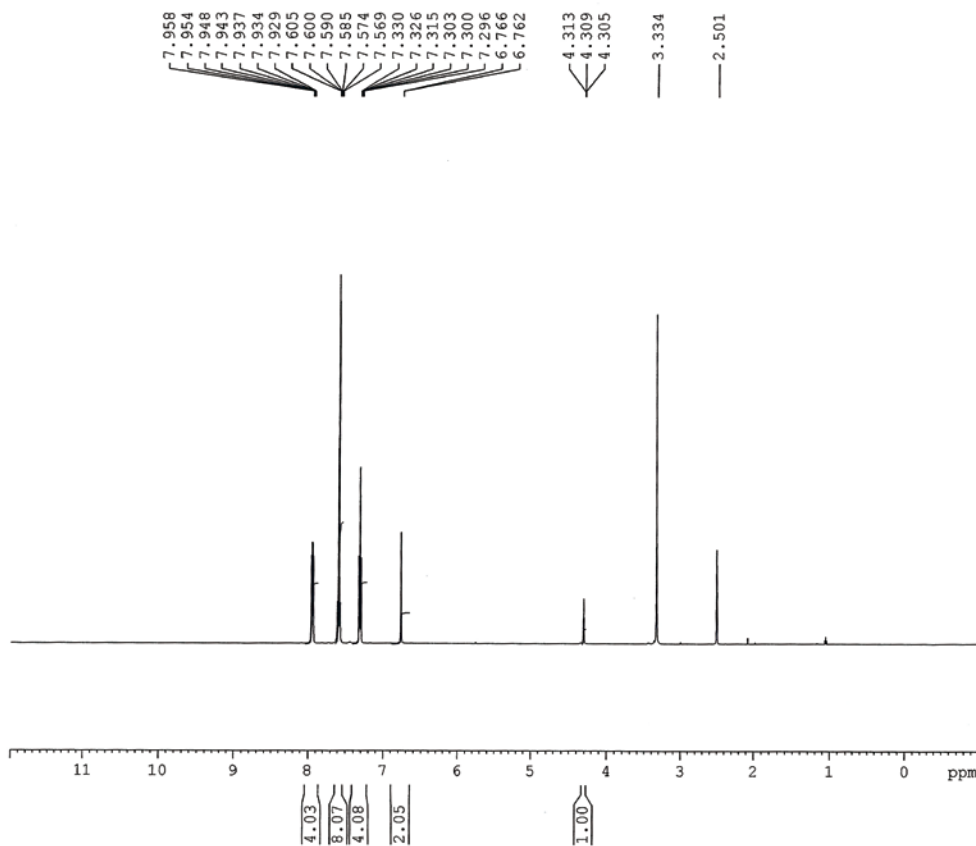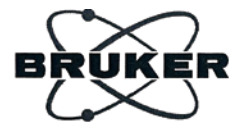

Current Data Parameters  
 NAME 137HW-1H  
 EXPNO 1  
 PROCNO 1

F2 - Acquisition Parameters  
 Date\_ 20171015  
 Time\_ 12.36  
 INSTRUM spect  
 PROBHD 5 mm PABBO BB-  
 PULPROG zg30  
 TD 65536  
 SOLVENT DMSO  
 NS 16  
 DS 2  
 SWH 12335.526 Hz  
 FIDRES 0.188225 Hz  
 AQ 2.6563926 sec  
 RG 203  
 DW 40.533 usec  
 DE 20.00 usec  
 TE 298.0 K  
 D1 1.00000000 sec  
 TD0 1

----- CHANNEL f1 -----  
 SF01 600.1337060 MHz  
 NUC1 1H  
 P1 10.60 usec  
 PLW1 27.82500076 W

F2 - Processing parameters  
 SI 32768  
 SF 600.1300000 MHz  
 WDW EM  
 SSB 0  
 LB 0.30 Hz  
 GB 0  
 PC 1.00

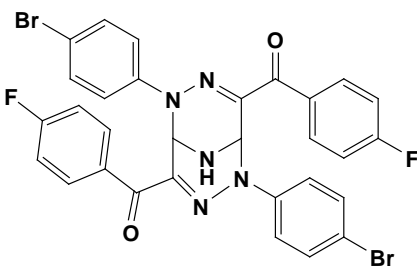

<sup>13</sup>C NMR spectrum of compound **2b**

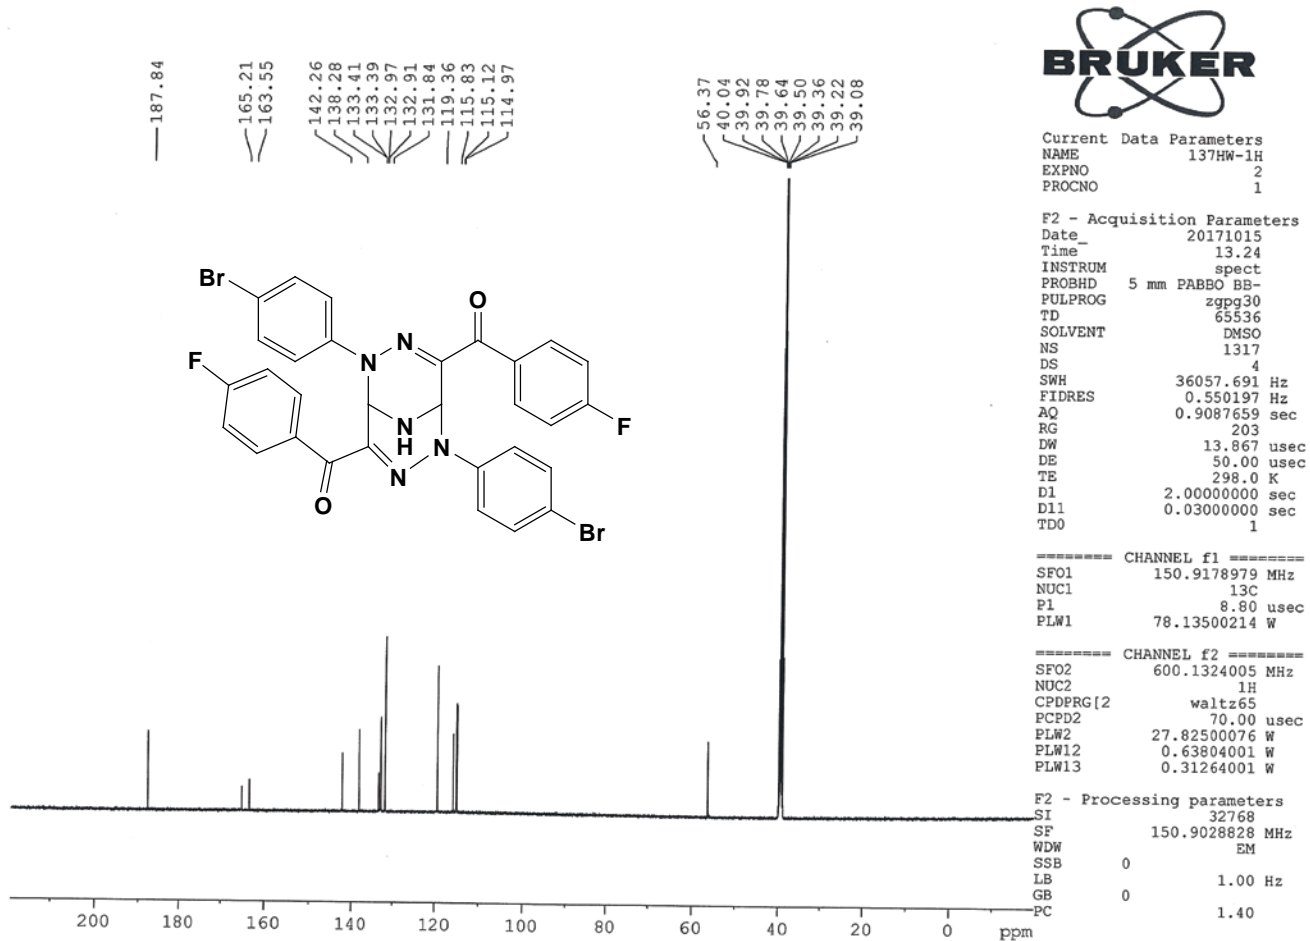

<sup>1</sup>H NMR spectrum of compound **2c**

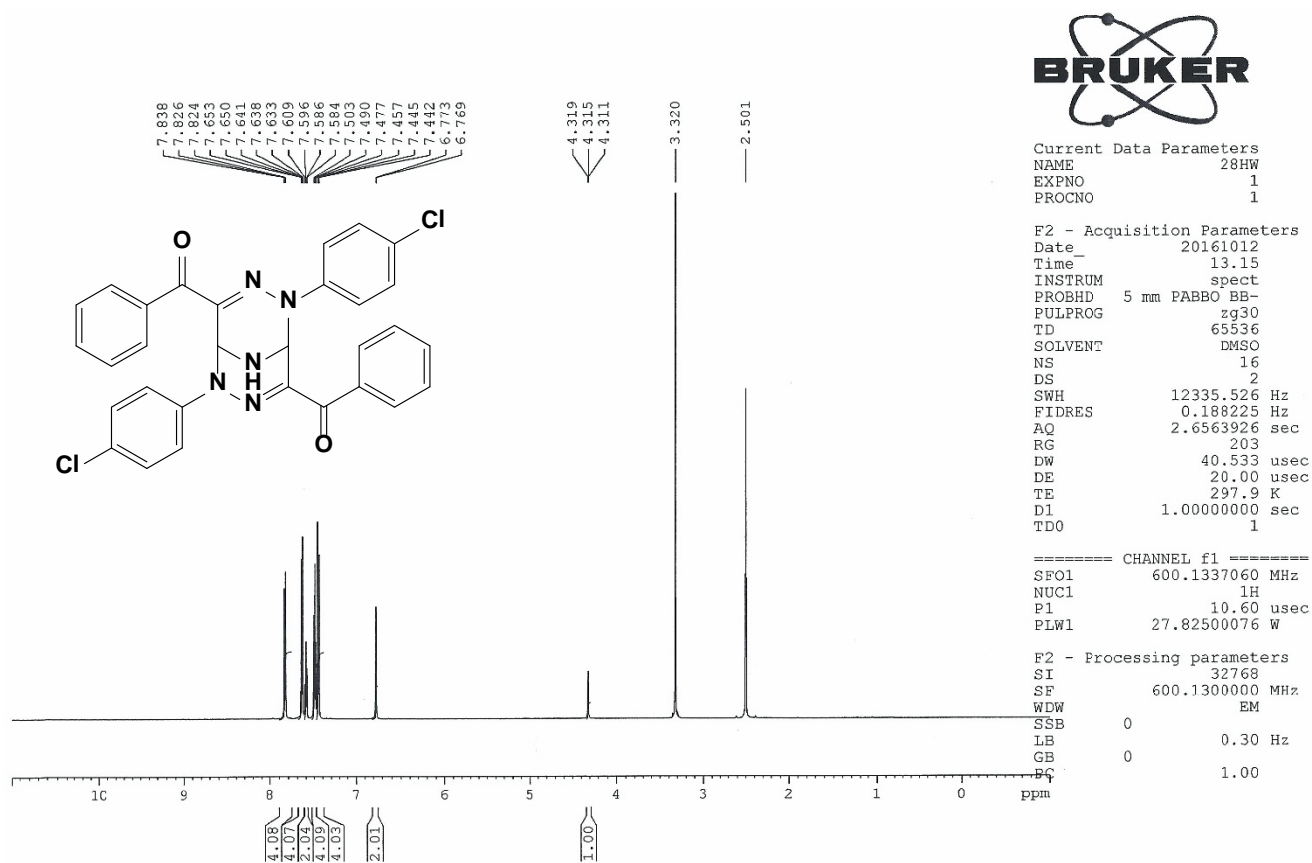

<sup>13</sup>C NMR spectrum of compound **2c**

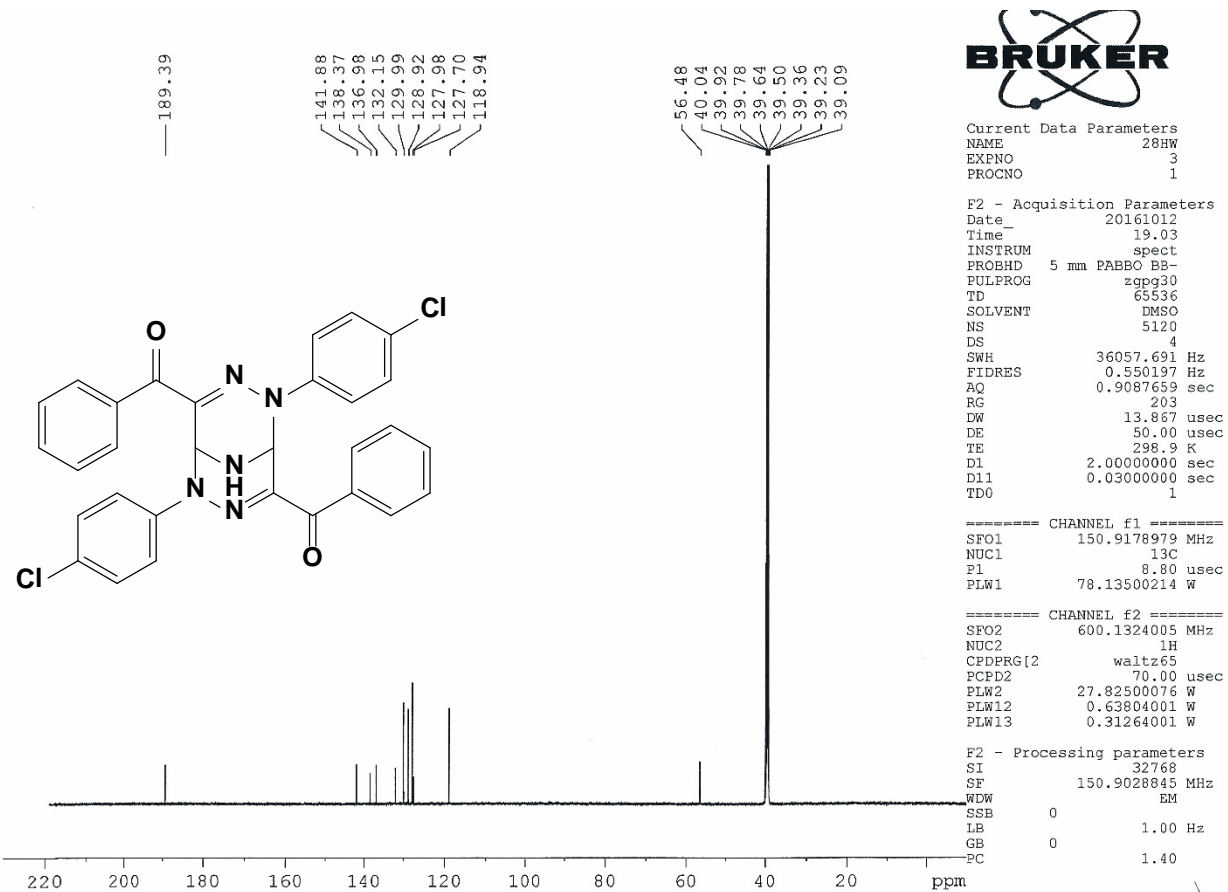

<sup>1</sup>H NMR spectrum of compound **2d**

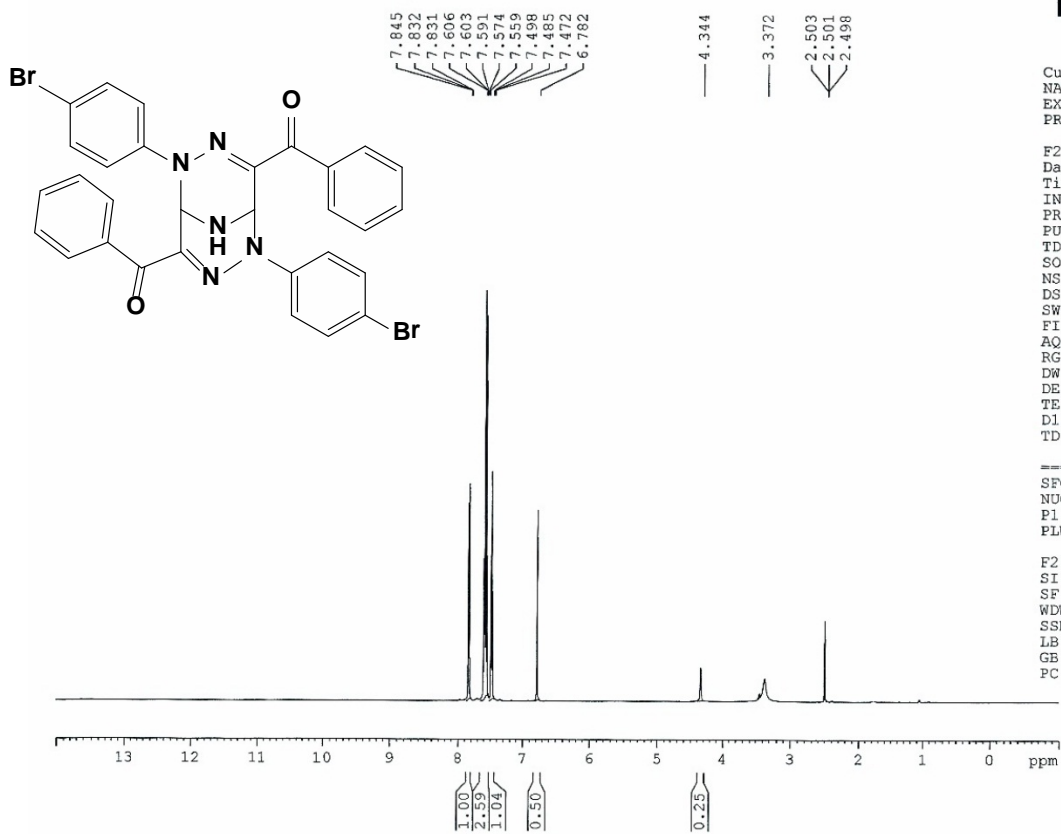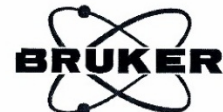

Current Data Parameters  
 NAME 45HW  
 EXPNO 1  
 PROCNO 1

F2 - Acquisition Parameters  
 Date\_ 20161114  
 Time\_ 11.12  
 INSTRUM spect  
 PROBHD 5 mm PABBO BB-  
 PULPROG zg30  
 TD 65536  
 SOLVENT DMSO  
 NS 8  
 DS 2  
 SWH 12335.526 Hz  
 FIDRES 0.188225 Hz  
 AQ 2.6563926 sec  
 RG 161  
 DW 40.533 usec  
 DE 20.00 usec  
 TE 295.3 K  
 D1 1.00000000 sec  
 TD0 1

==== CHANNEL f1 =====  
 SFO1 600.1337060 MHz  
 NUC1 1H  
 P1 10.60 usec  
 PLW1 27.82500076 W

F2 - Processing parameters  
 SI 32768  
 SF 600.1300000 MHz  
 WDW EM  
 SSB 0  
 LB 0.30 Hz  
 GB 0  
 PC 1.00

<sup>13</sup>C NMR spectrum of compound 2d

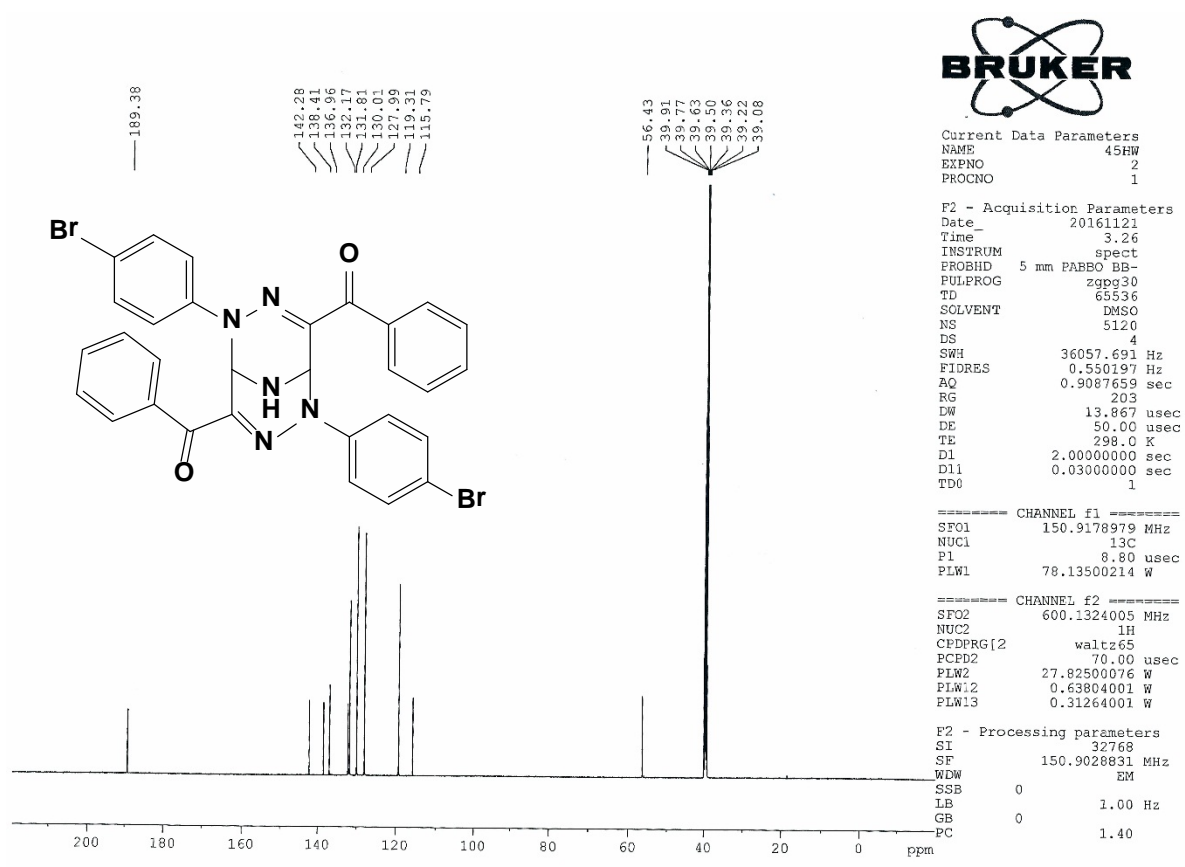



<sup>1</sup>H NMR spectrum of compound **2e**

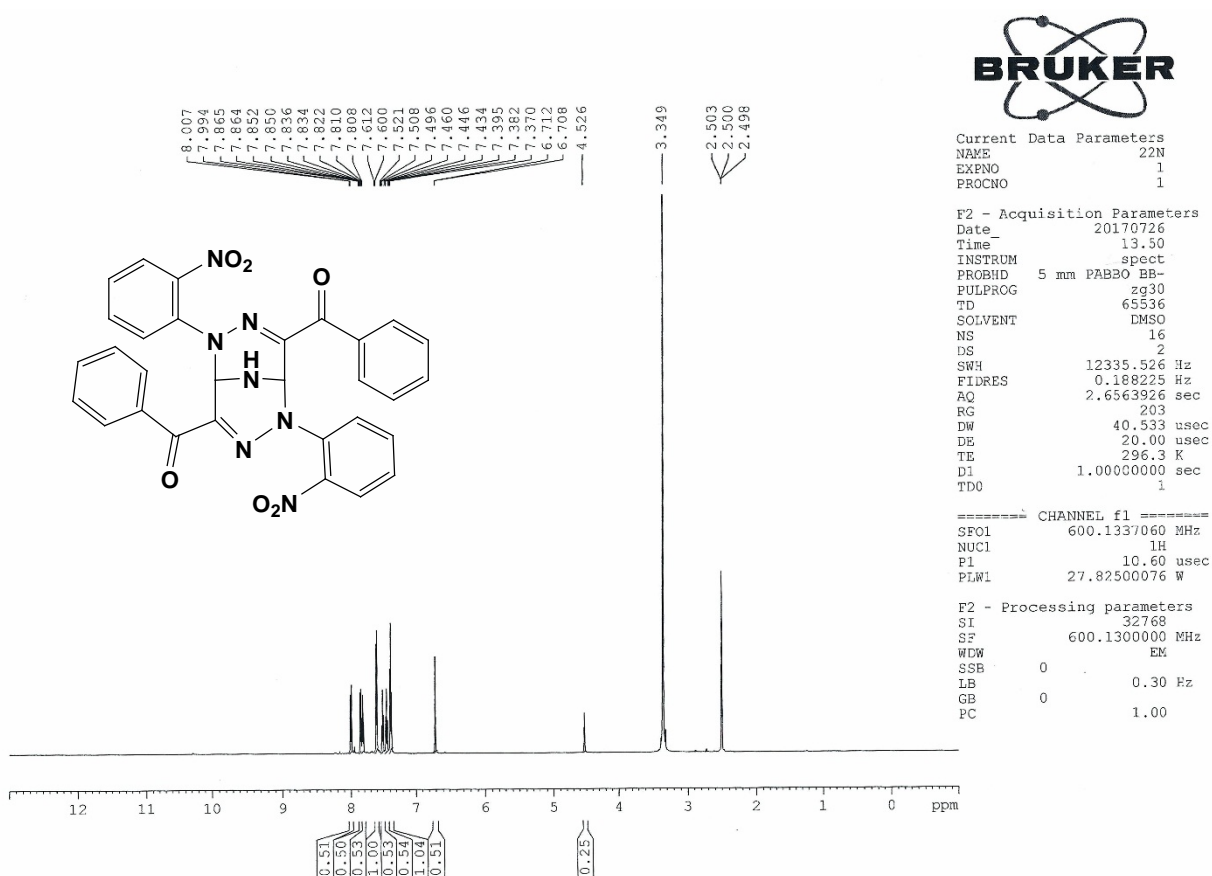

<sup>13</sup>C NMR spectrum of compound 2e

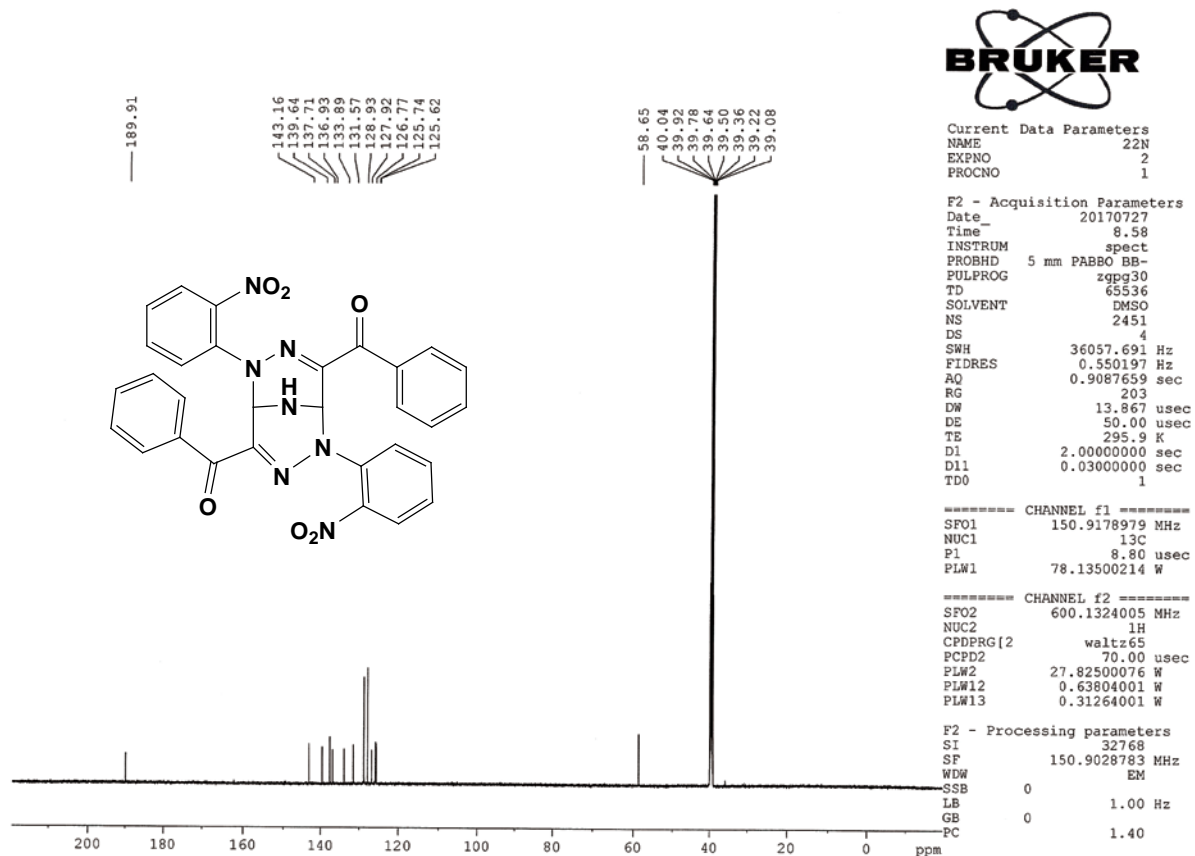

<sup>1</sup>H NMR spectrum of compound **2f**

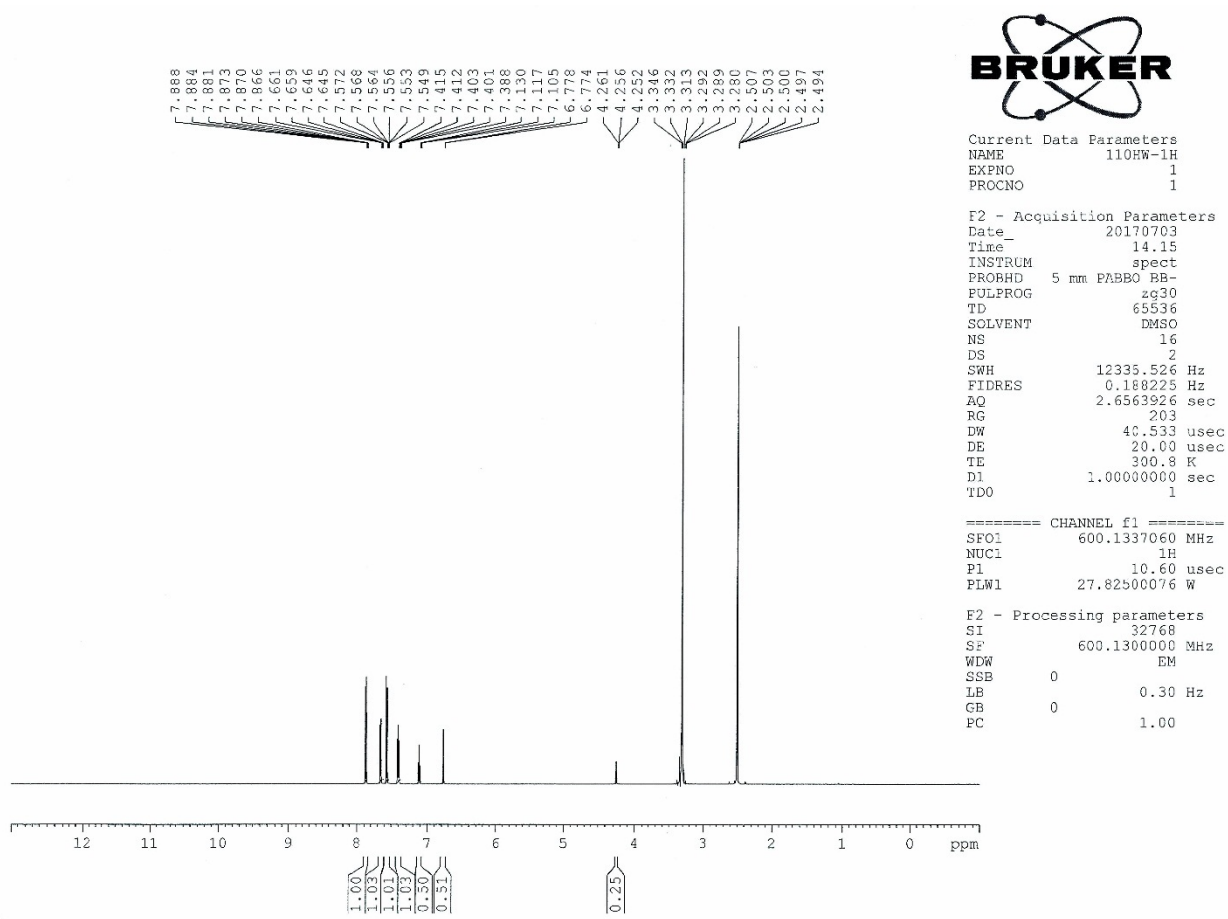

<sup>13</sup>C NMR spectrum of compound **2f**

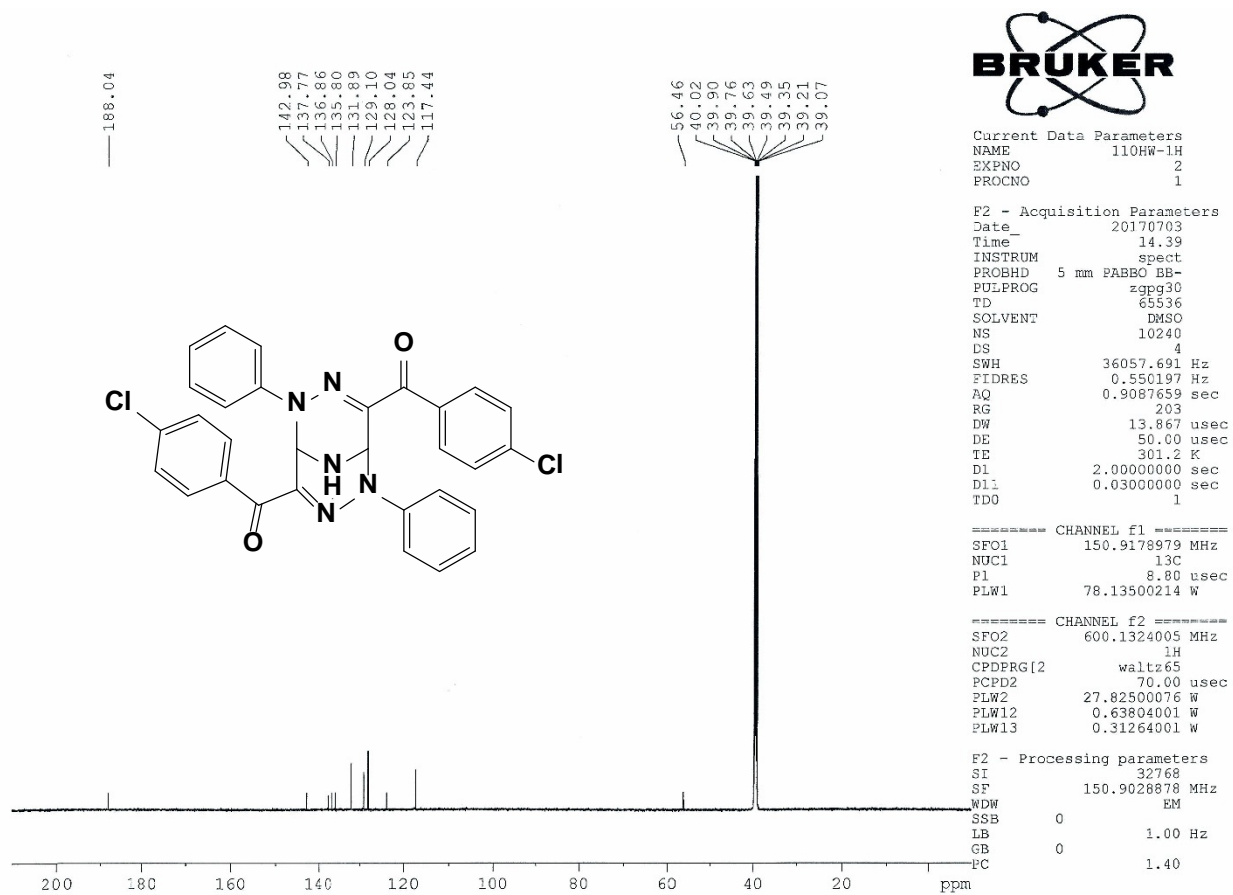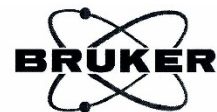

Current Data Parameters  
 NAME 110HW-1H  
 EXPNO 2  
 PROCNO 1

F2 - Acquisition Parameters  
 Date 20170703  
 Time 14.39  
 INSTRUM spect  
 PROBHD 5 mm PABBO BB-  
 PULPROG zgpg30  
 TD 65536  
 SOLVENT DMSO  
 NS 10240  
 DS 4  
 SWH 36057.691 Hz  
 FIDRES 0.550197 Hz  
 AQ 0.9087659 sec  
 RG 203  
 DW 13.867 usec  
 DE 50.00 usec  
 TE 301.2 K  
 D1 2.0000000 sec  
 D11 0.0300000 sec  
 TD0 1

===== CHANNEL f1 =====  
 SFO1 150.9178979 MHz  
 NUC1 13C  
 P1 8.80 usec  
 PLW1 78.13500214 W

===== CHANNEL f2 =====  
 SFO2 600.1324005 MHz  
 NUC2 1H  
 CPDPRG[2] waltz65  
 PCPD2 70.00 usec  
 PLW2 27.82500076 W  
 PLW12 0.63804001 W  
 PLW13 0.31264001 W

F2 - Processing parameters  
 SI 32768  
 SF 150.9028878 MHz  
 WDW EM  
 SSB 0  
 LB 1.00 Hz  
 GB 0  
 PC 1.40

<sup>1</sup>H NMR spectrum of compound 2g

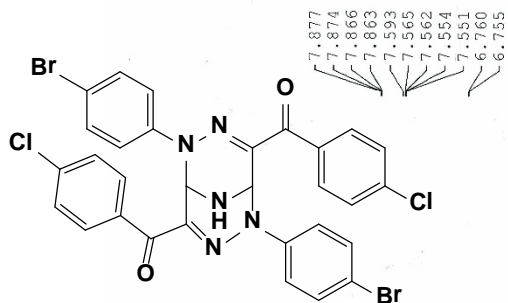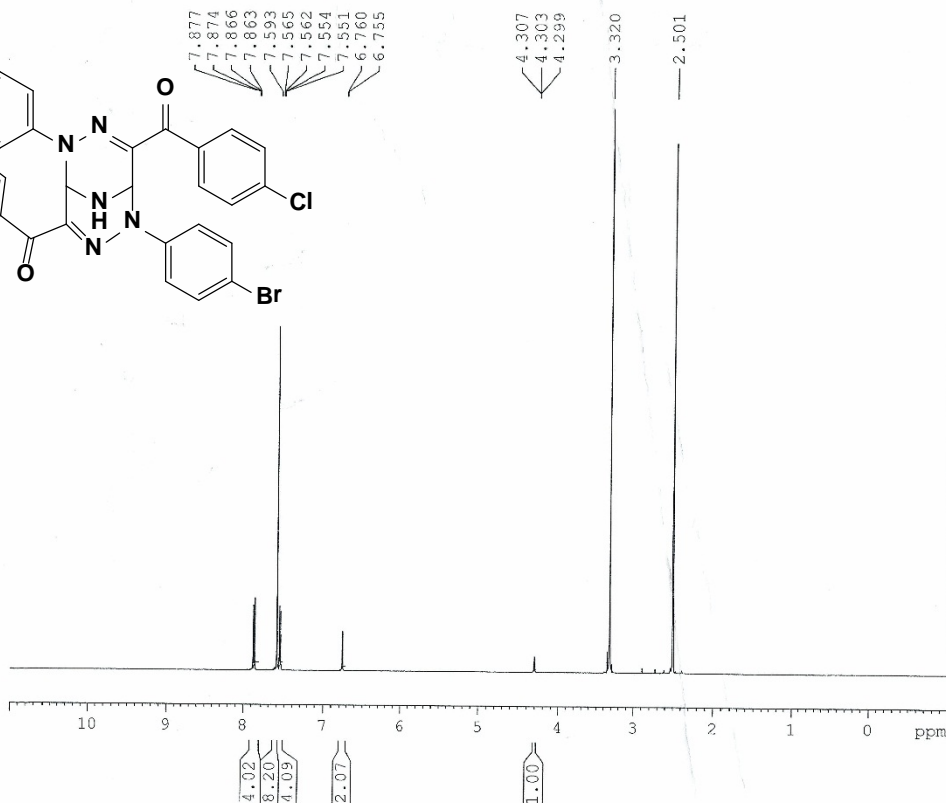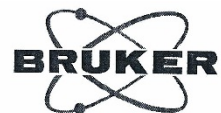

Current Data Parameters  
NAME 107HW-1H  
EXPNO 5  
PROCNO 1

F2 - Acquisition Parameters  
Date\_ 20170620  
Time 17.12  
INSTRUM spect  
PROBHD 5 mm PABBO BB-  
PULPROG zg30  
TD 65536  
SOLVENT DMSO  
NS 16  
DS 2  
SWH 12335.526 Hz  
FIDRES 0.188225 Hz  
AQ 2.6563926 sec  
RG 203  
DW 40.533 usec  
DE 20.00 usec  
TE 298.0 K  
D1 1.0000000 sec  
TD0 1

==== CHANNEL f1 =====  
SFO1 600.1337060 MHz  
NUC1 1H  
P1 10.60 usec  
PLW1 27.82500076 W

F2 - Processing parameters  
SI 32768  
SF 600.1300000 MHz  
WDW EM  
SSB 0  
LB 0.30 Hz  
GB 0  
PC 1.00

<sup>13</sup>C NMR spectrum of compound 2g

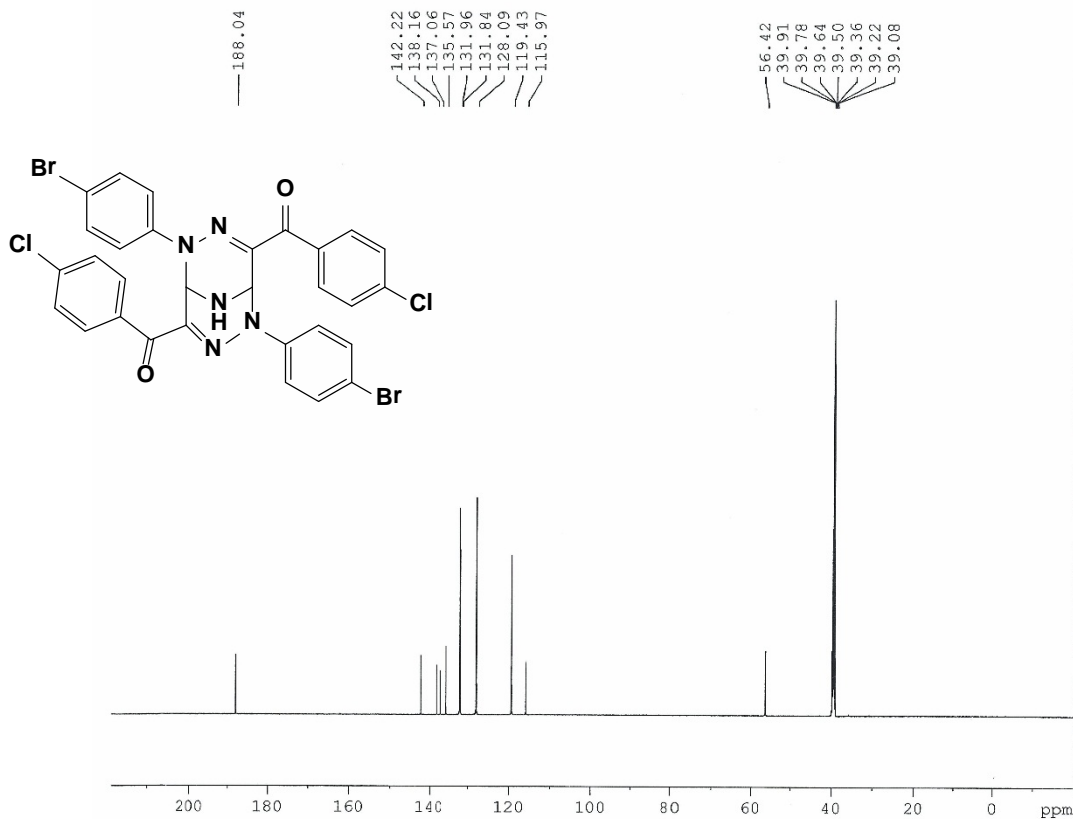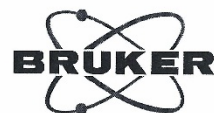

Current Data Parameters  
 NAME 107HW-1H  
 EXPNO 2  
 PROCNO 1

F2 - Acquisition Parameters  
 Date\_ 20170618  
 Time\_ 19.45  
 INSTRUM spect  
 PROBHD 5 mm PABBO BB-  
 PULPROG zgpg30  
 TD 65536  
 SOLVENT DMSO  
 NS 7168  
 DS 4  
 SWH 36057.691 Hz  
 FIDRES 0.550197 Hz  
 AQ 0.9087659 sec  
 RG 203  
 DW 13.867 usec  
 DE 50.00 usec  
 TE 298.0 K  
 D1 2.00000000 sec  
 D11 0.03000000 sec  
 TD0 1

===== CHANNEL f1 =====  
 SFO1 150.9178979 MHz  
 NUC1 13C  
 P1 8.80 usec  
 PLW1 78.13500214 W

===== CHANNEL f2 =====  
 SFO2 600.1324005 MHz  
 NUC2 1H  
 CPDPRG[2] waltz65  
 PCPD2 70.00 usec  
 PLW2 27.82500076 W  
 PLW12 0.63804001 W  
 PLW13 0.31264001 W

F2 - Processing parameters  
 SI 32768  
 SF 150.9028839 MHz  
 WDW EM  
 SSB 0  
 LB 1.00 Hz  
 GB 0  
 PC 1.40

<sup>1</sup>H NMR spectrum of compound **2h**

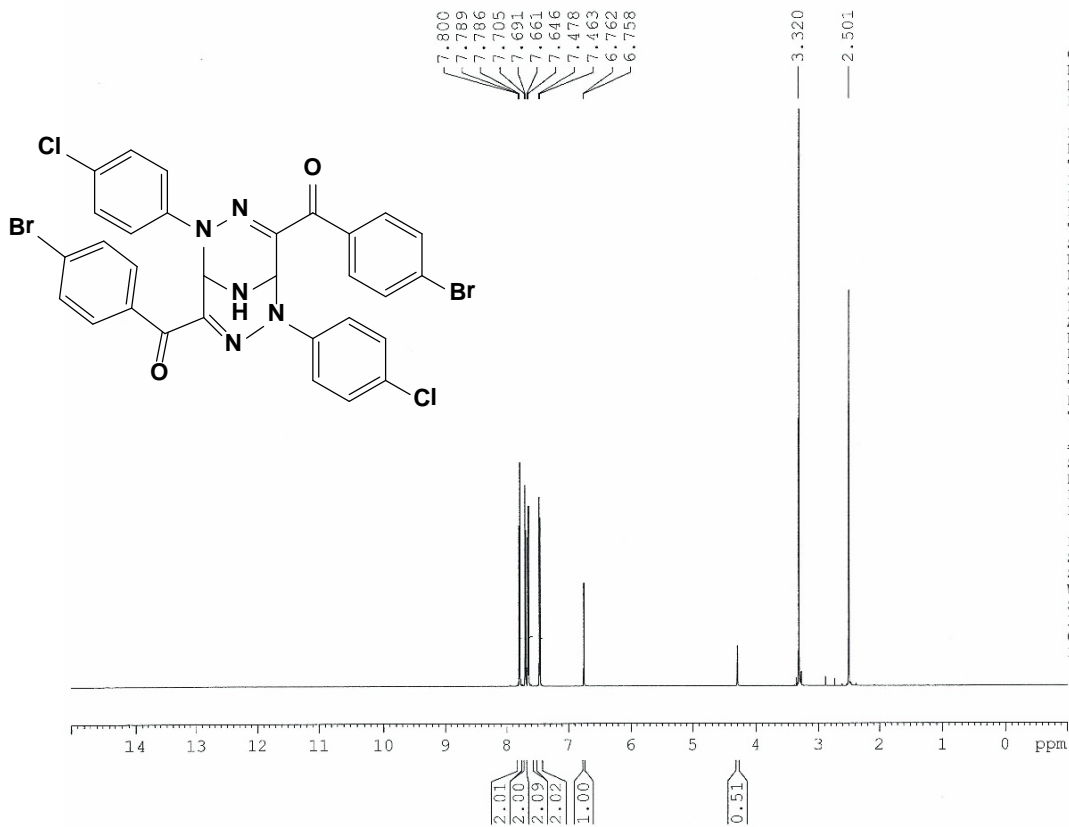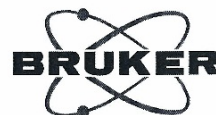

Current Data Parameters  
NAME 125HW  
EXPNO 1  
PROCNO 1

F2 - Acquisition Parameters  
Date\_ 20170802  
Time 8.15  
INSTRUM spect  
PROBHD 5 mm PABBO BB-  
PULPROG zg30  
TD 65536  
SOLVENT DMSO  
NS 16  
DS 2  
SWH 12335.526 Hz  
FIDRES 0.188225 Hz  
AQ 2.6563926 sec  
RG 203  
DW 40.533 usec  
DE 20.00 usec  
TE 298.0 K  
D1 1.0000000 sec  
TDO 1

==== CHANNEL f1 =====  
SF01 600.1337060 MHz  
NUC1 1H  
P1 10.60 usec  
PLW1 27.82500076 W

F2 - Processing parameters  
SI 32768  
SF 600.1300000 MHz  
WDW EM  
SSB 0  
LB 0.30 Hz  
GB 0  
PC 1.00

<sup>13</sup>C NMR spectrum of compound **2h**

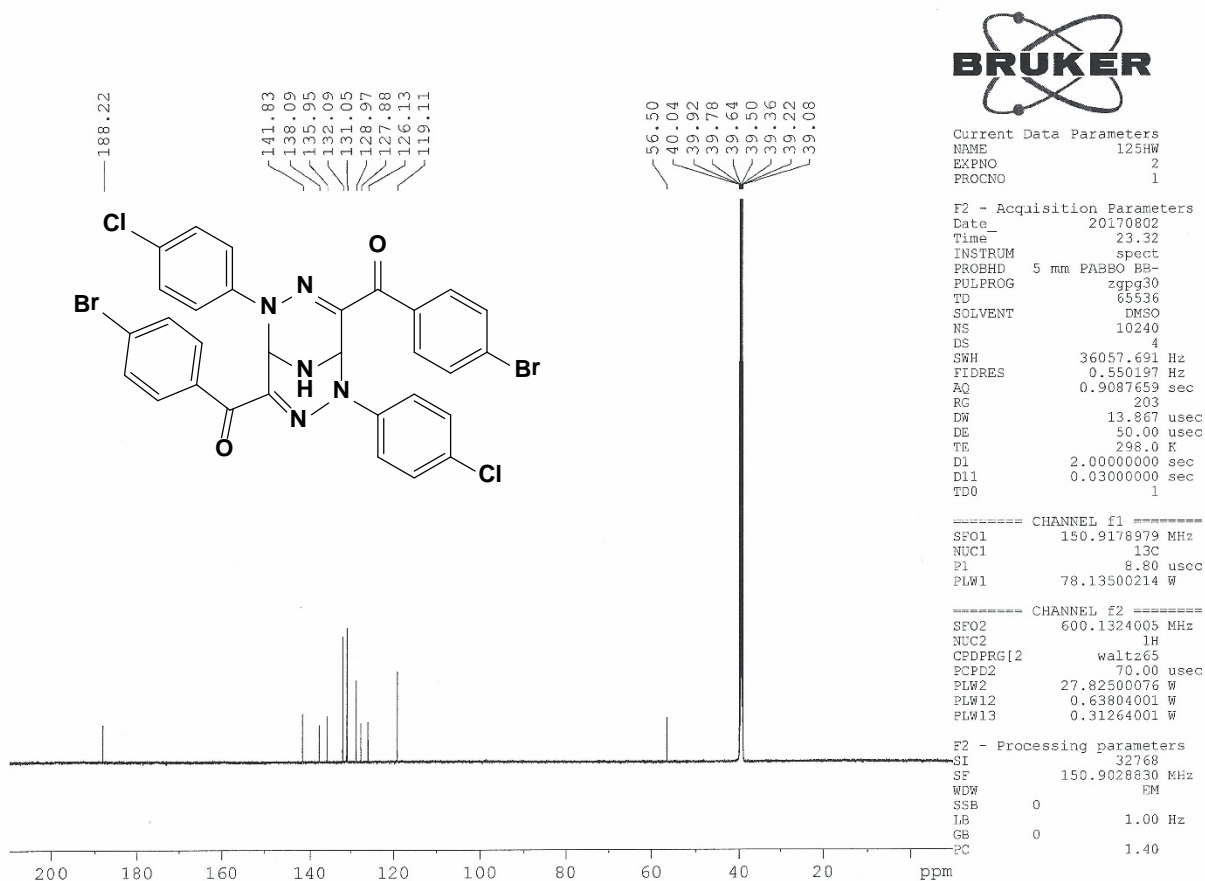



<sup>1</sup>H NMR spectrum of compound **2i**

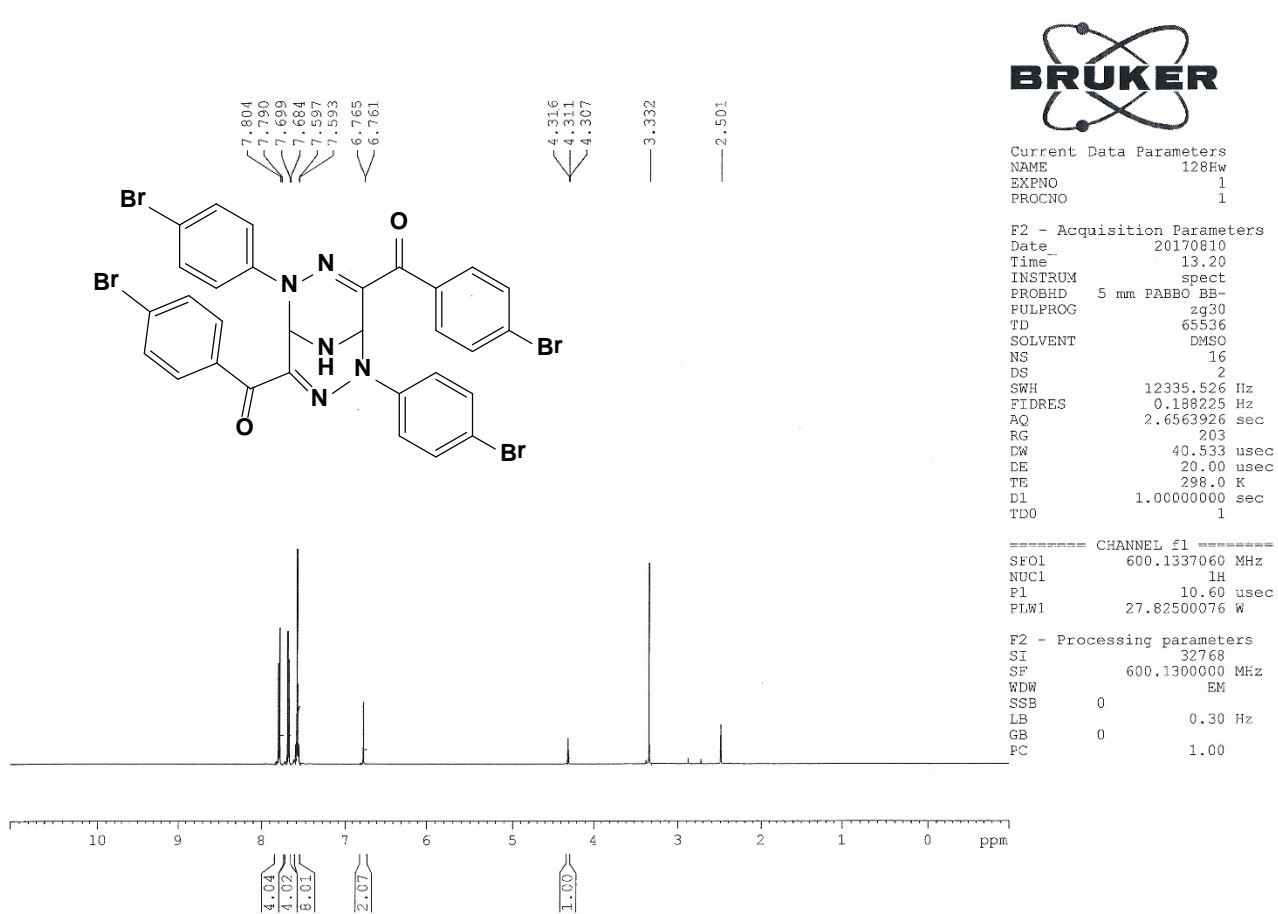

<sup>13</sup>C NMR spectrum of compound 2i

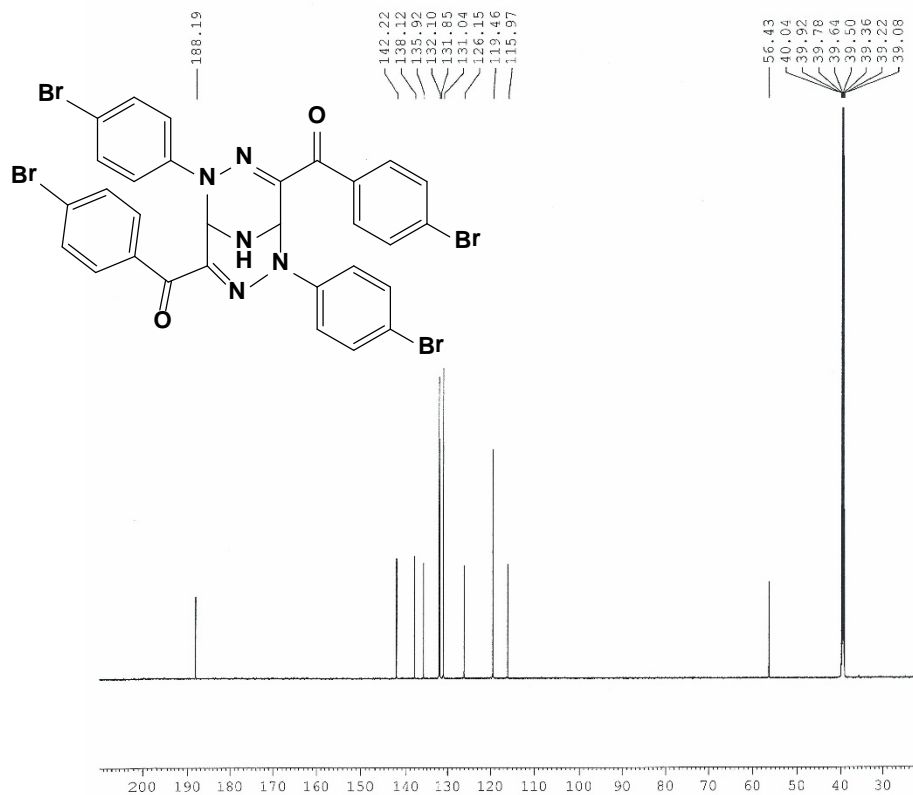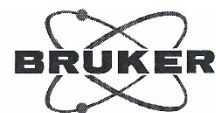

Current Data Parameters  
NAME 128HW  
EXPNO 2  
PROCNO 1

F2 - Acquisition Parameters  
Date\_ 20170812  
Time\_ 6.27  
INSTRUM spect  
PROBHD 5 mm PABBO BB-  
PULPROG zgpg30  
TD 65536  
SOLVENT DMSO  
NS 5120  
DS 4  
SWH 36057.691 Hz  
FIDRES 0.550197 Hz  
AQ 0.9087659 sec  
RG 203  
DW 13.867 usec  
DE 50.00 usec  
TE 298.0 K  
D1 2.0000000 sec  
D11 0.0300000 sec  
TDO 1

===== CHANNEL f1 =====  
SFO1 150.9178979 MHz  
NUC1 13C  
P1 8.80 usec  
PLW1 78.13500214 W

===== CHANNEL f2 =====  
SFO2 600.1324005 MHz  
NUC2 1H  
CPDPRG[2] waltz65  
PCPD2 70.00 usec  
PLW2 27.82500076 W  
PLW12 0.63804001 W  
PLW13 0.31264001 W

F2 - Processing parameters  
SI 32768  
SF 150.9028837 MHz  
WDW EM  
SSB 0  
LB 1.00 Hz  
GB 0  
PC 1.40

<sup>1</sup>H NMR spectrum of compound 2j

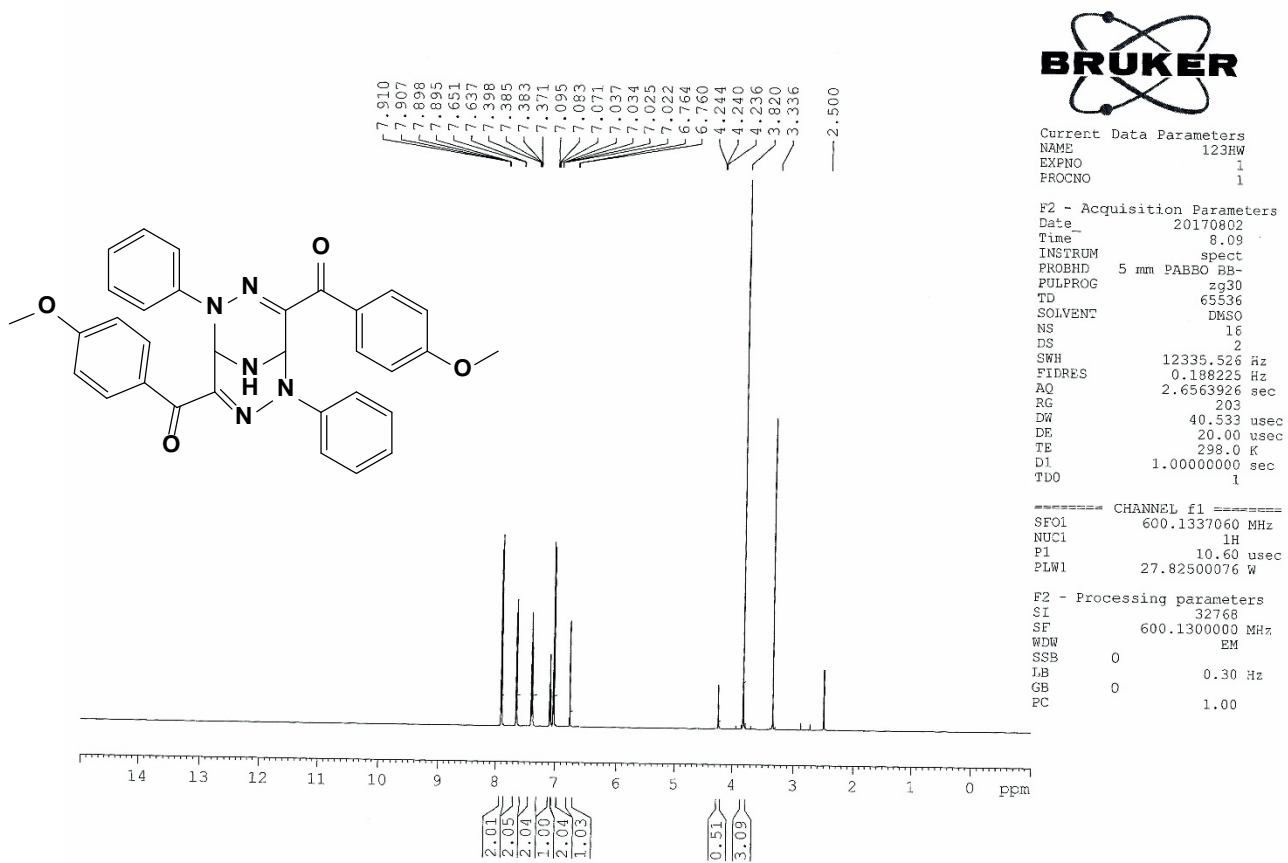

<sup>13</sup>C NMR spectrum of compound 2j

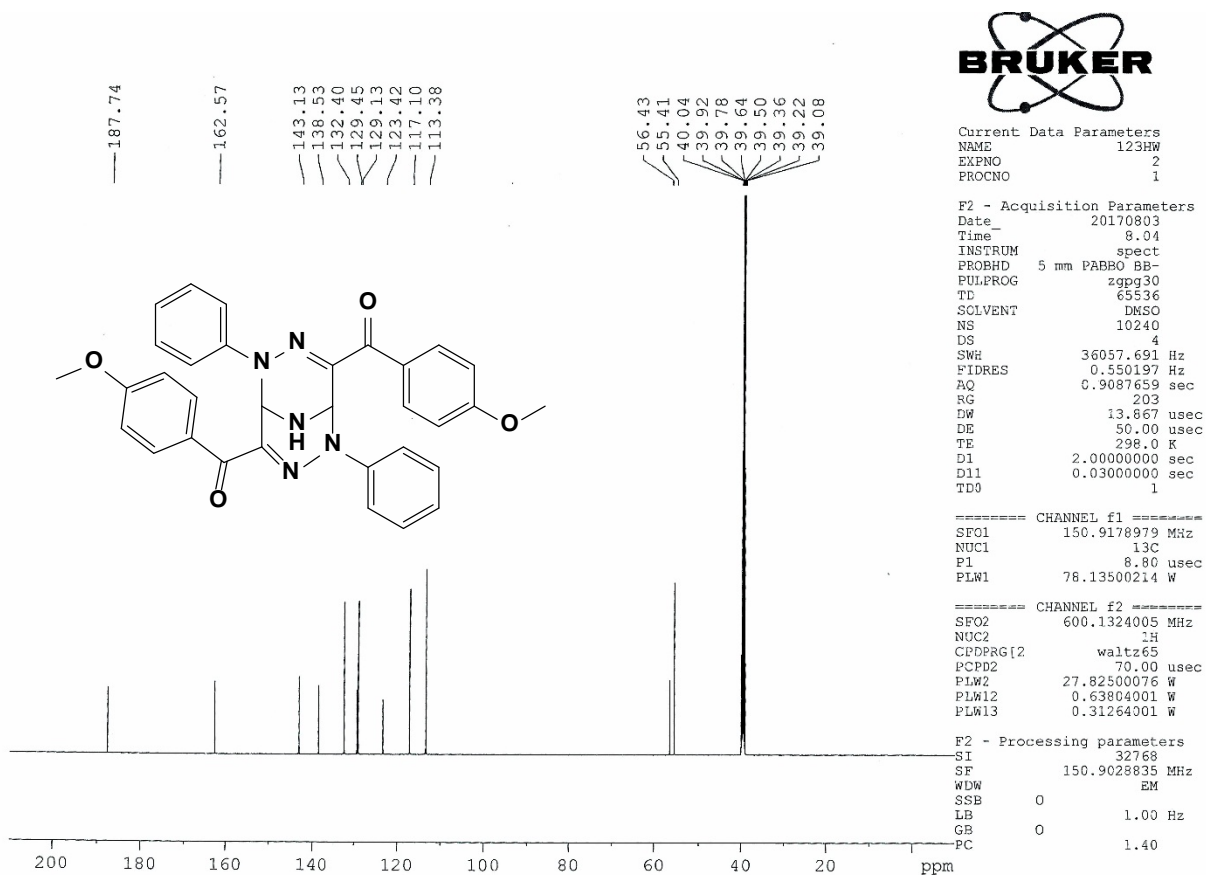

<sup>1</sup>H NMR spectrum of compound **2k**

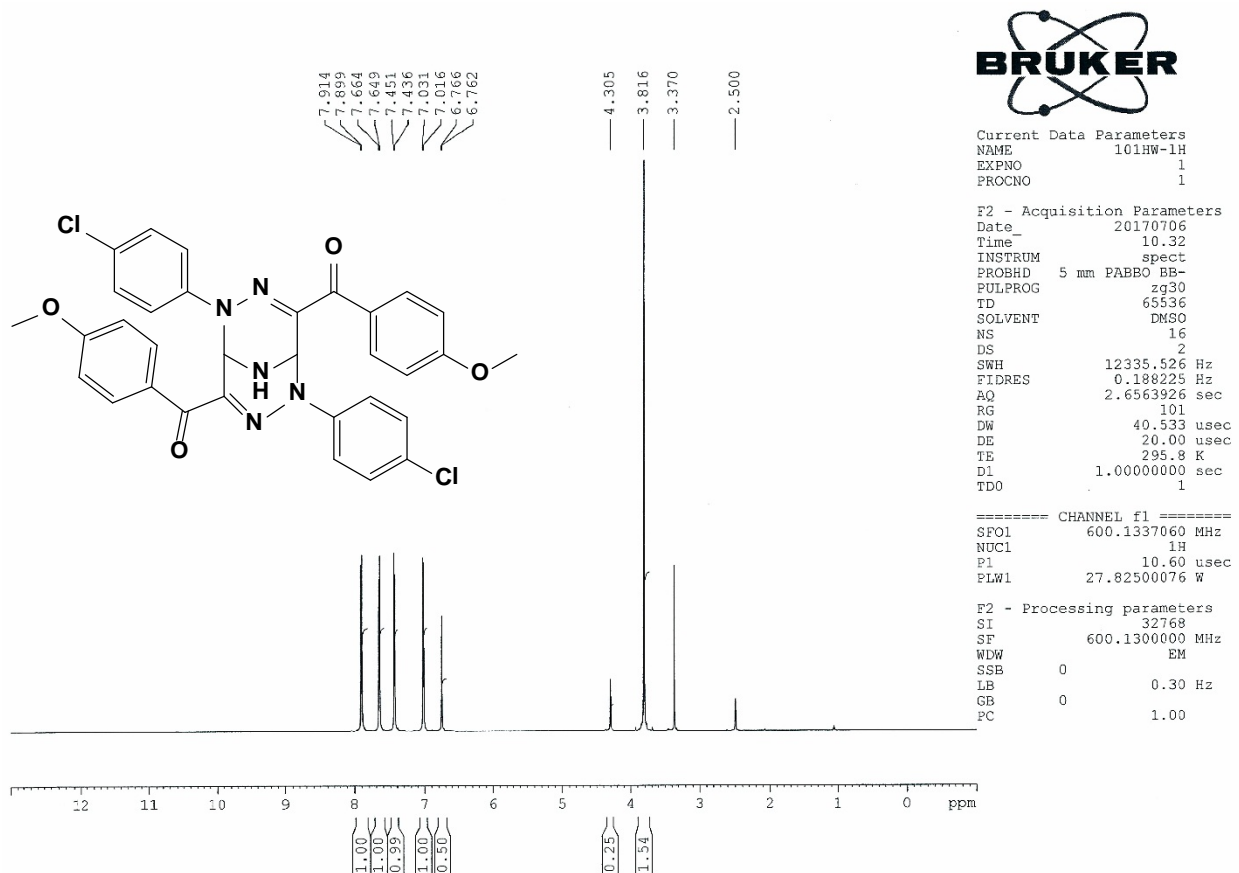

<sup>13</sup>C NMR spectrum of compound **2k**

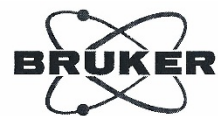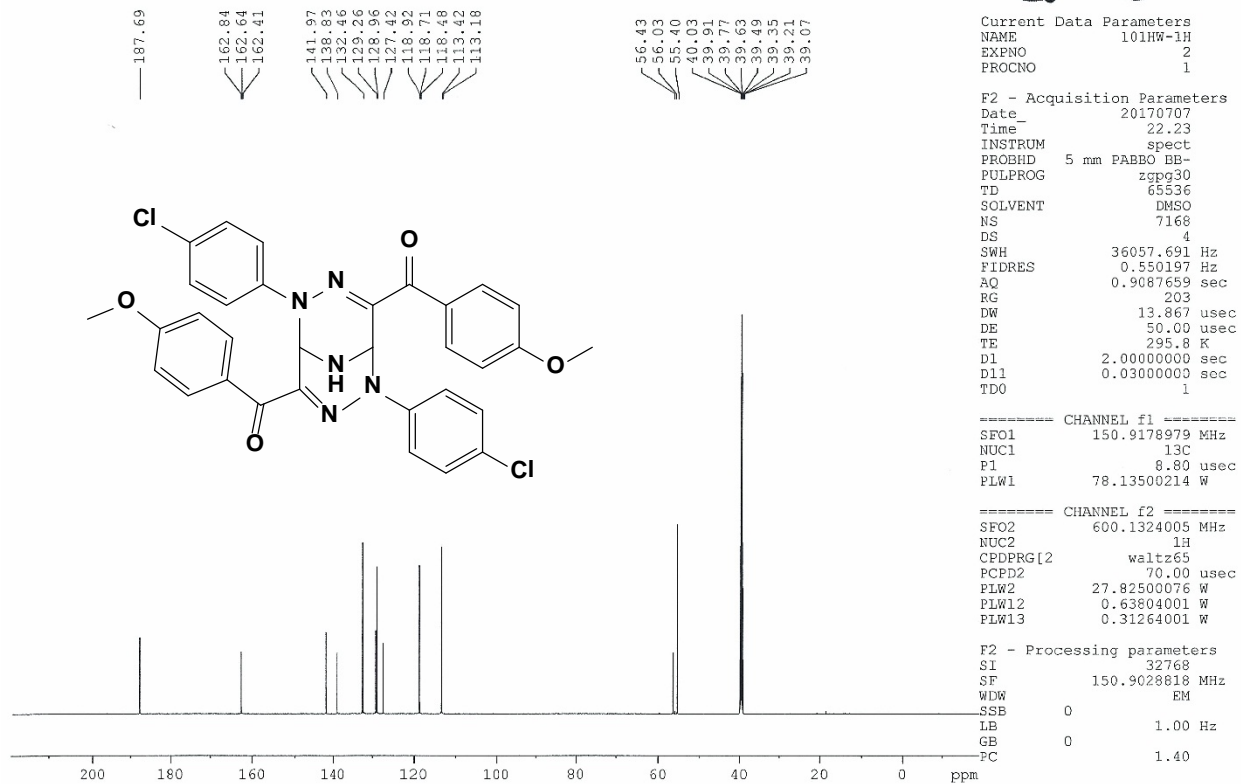

<sup>1</sup>H NMR spectrum of compound **2l**

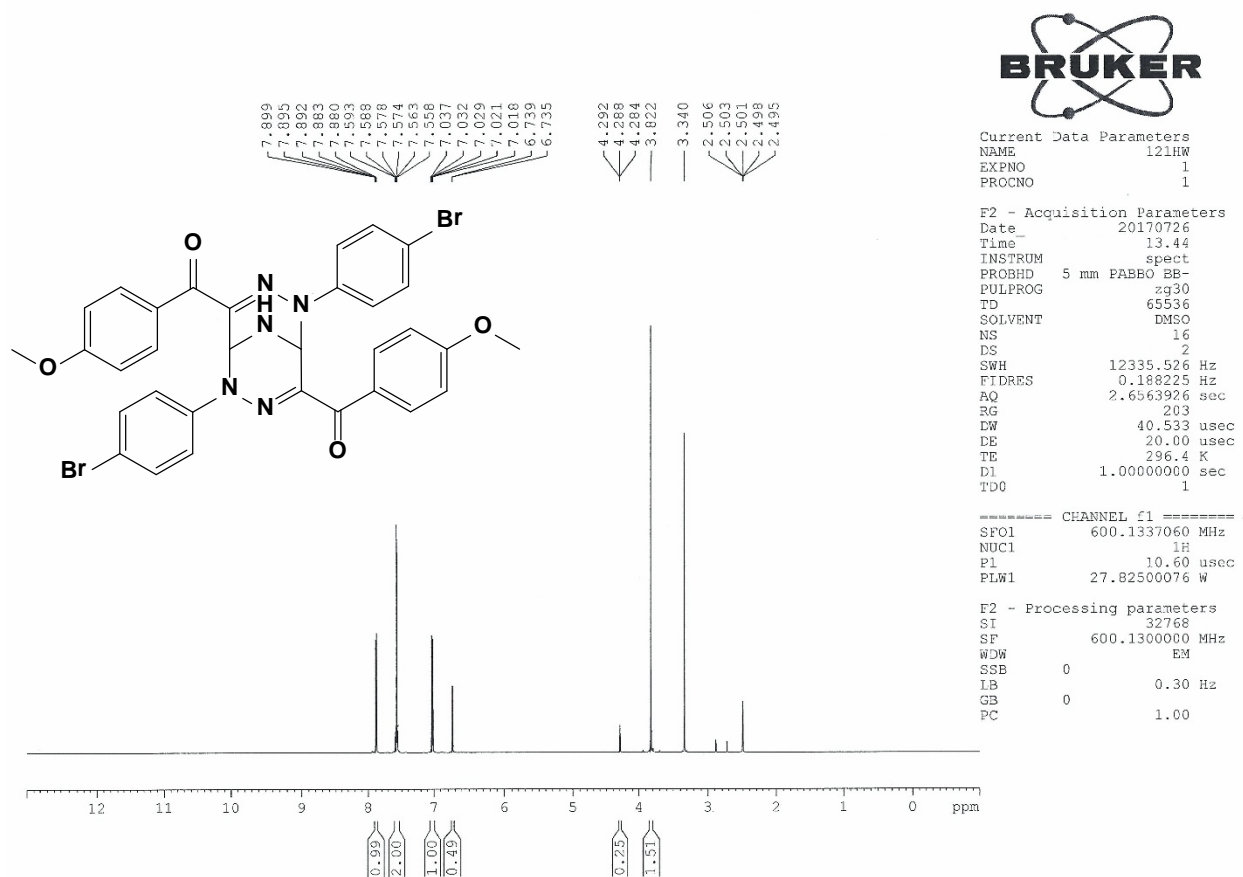

<sup>13</sup>C NMR spectrum of compound **21**

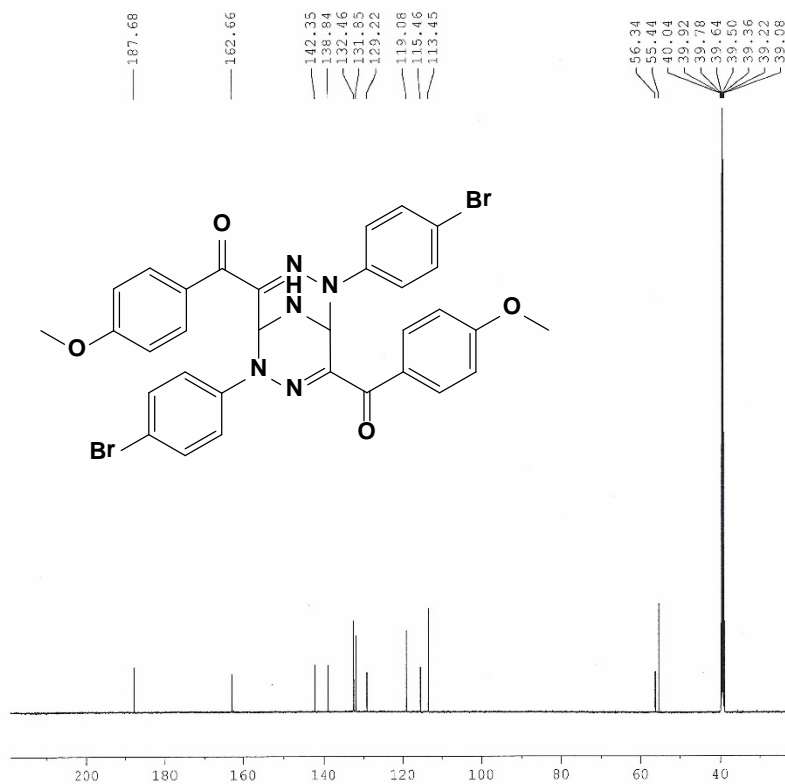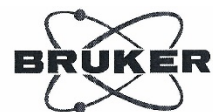

Current Data Parameters  
NAME 121HW  
EXPNO 2  
PROCNO 1

F2 - Acquisition Parameters  
Date\_ 20170727  
Time 8.43  
INSTRUM spect  
PROBHD 5 mm PABBO BB-  
PULPROG zgpg30  
TD 65536  
SOLVENT DMSO  
NS 1145  
DS 4  
SWH 36057.691 Hz  
FIDRES 0.550197 Hz  
AQ 0.9087659 sec  
RG 203  
DW 13.867 usec  
DE 50.00 usec  
TE 296.0 K  
D1 2.0000000 sec  
D11 0.0300000 sec  
TD0 1

===== CHANNEL f1 =====  
SF01 150.9178979 MHz  
NUC1 13C  
P1 8.80 usec  
PLW1 78.13500214 W

===== CHANNEL f2 =====  
SF02 600.1324005 MHz  
NUC2 1H  
CPDPRG[2] waltz65  
PCPD2 70.00 usec  
PLW2 27.82500076 W  
PLW12 0.63804001 W  
PLW13 0.31264001 W

F2 - Processing parameters  
SI 32768  
SF 150.9028809 MHz  
WDW EM  
SSB 0  
LB 1.00 Hz  
GB 0  
SC 1.40



<sup>1</sup>H NMR spectrum of compound **2m**

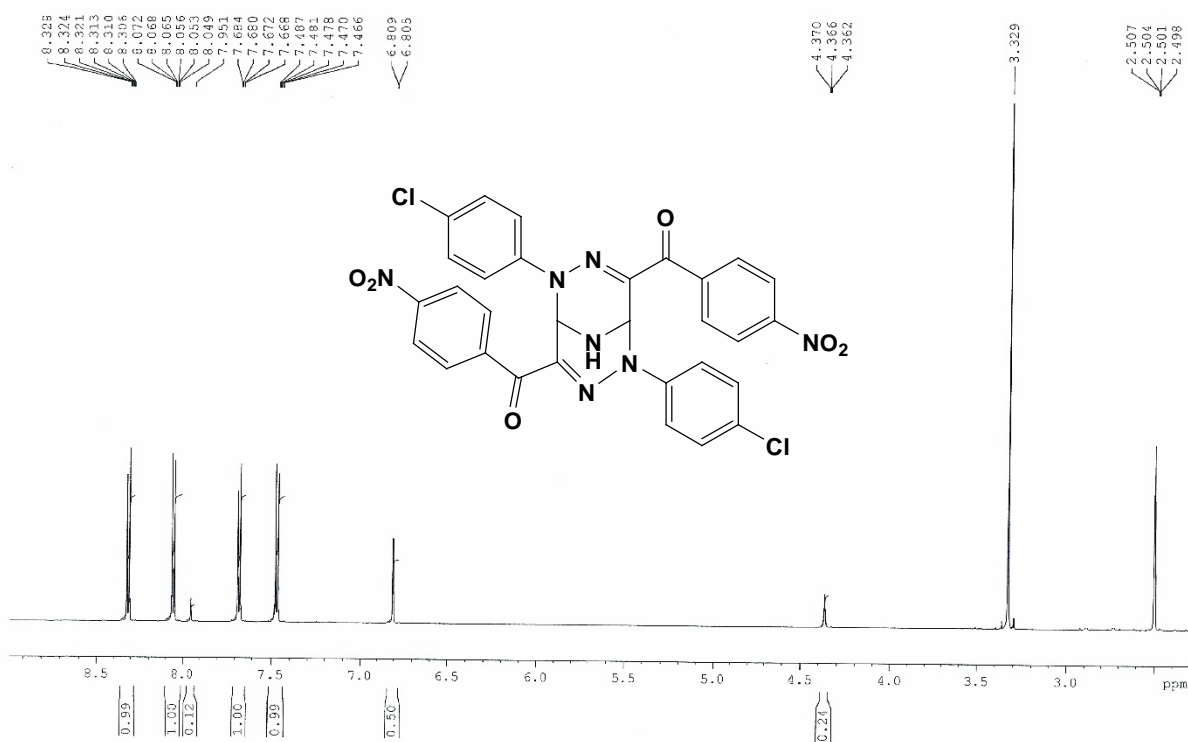

<sup>13</sup>C NMR spectrum of compound 2m

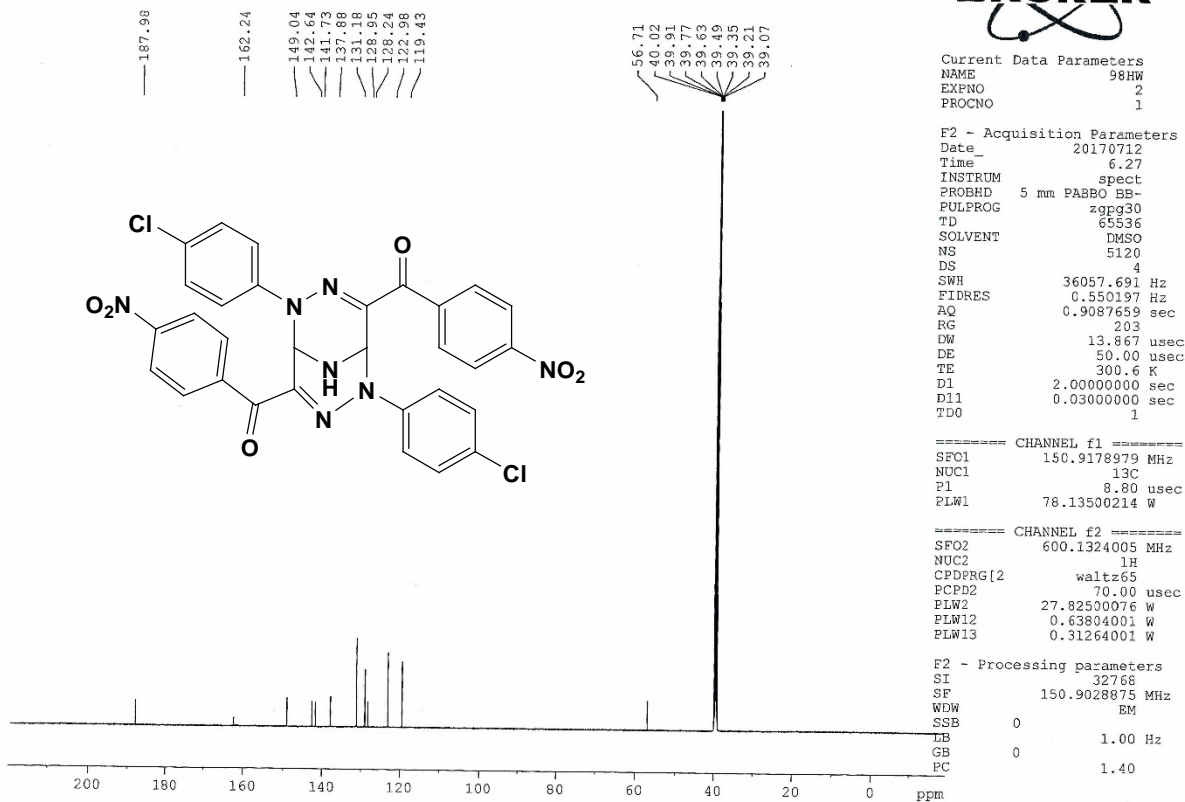

<sup>1</sup>H NMR spectrum of compound **2n**

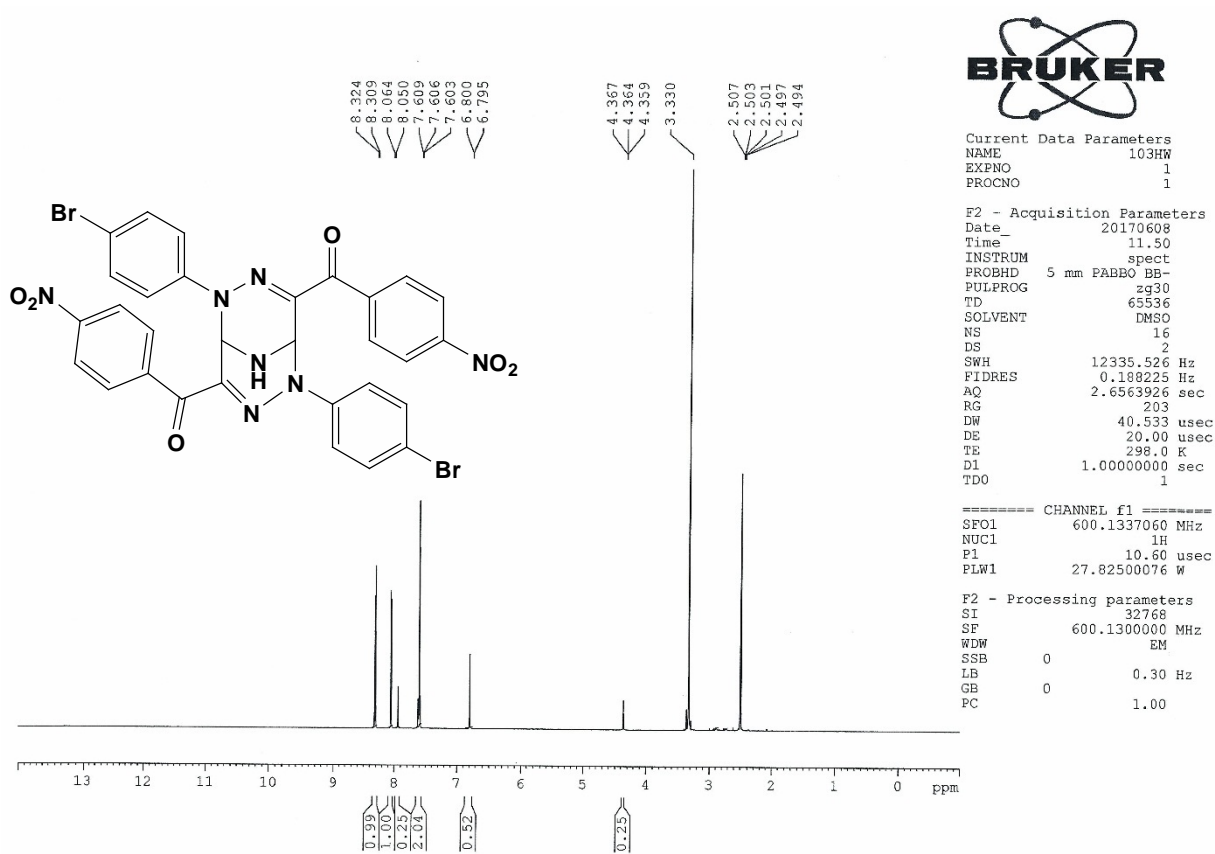

<sup>13</sup>C NMR spectrum of compound **2n**

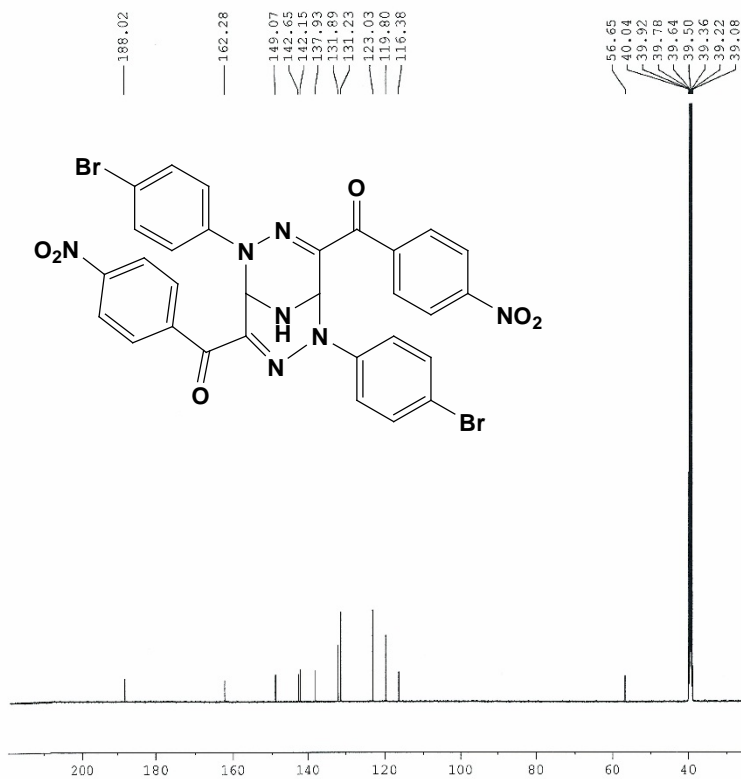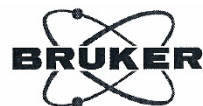

Current Data Parameters  
 NAME 103HW  
 EXPNO 2  
 PROCNO 1

F2 - Acquisition Parameters  
 Date\_ 20170609  
 Time 23.24  
 INSTRUM spect  
 PROBHD 5 mm PABBO BB-  
 PULPROG zgpg30  
 TD 65536  
 SOLVENT DMSO  
 NS 10240  
 DS 4  
 SWH 36057.691 Hz  
 FIDRES 0.550197 Hz  
 AQ 0.9087659 sec  
 RG 203  
 DW 13.867 usec  
 DE 50.00 usec  
 TR 298.0 K  
 D1 2.0000000 sec  
 D11 0.0300000 sec  
 TDO 1

==== CHANNEL f1 =====  
 SFO1 150.9178979 MHz  
 NUC1 13C  
 P1 8.80 usec  
 PLW1 78.13500214 W

==== CHANNEL f2 =====  
 SFO2 600.1324005 MHz  
 NUC2 1H  
 CPDPRG[2] waltz65  
 PCPD2 70.00 usec  
 PLW2 27.82500076 W  
 PLW12 0.63804001 W  
 PLW13 0.31264001 W

F2 - Processing parameters  
 SI 32768  
 SF 150.9028818 MHz  
 WDR EM  
 SSB 0  
 LB 1.00 Hz  
 GB 0  
 PC 1.40

<sup>1</sup>H NMR spectrum of compound **2o**

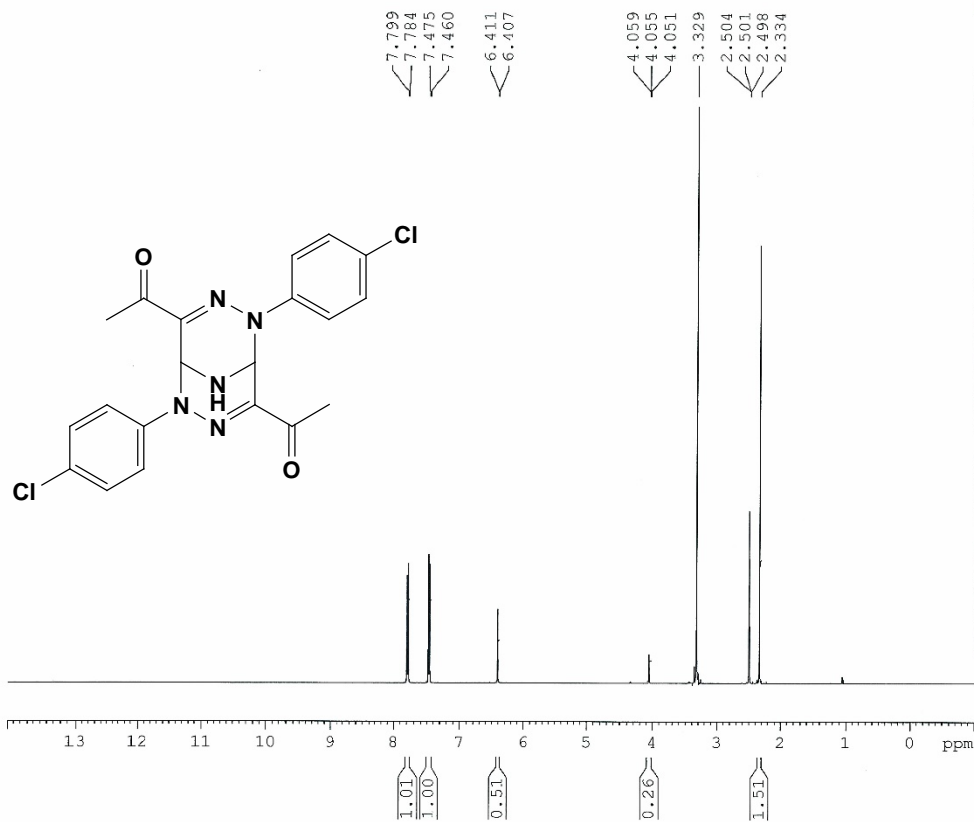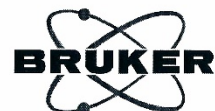

Current Data Parameters  
NAME 8HW-1H  
EXPNO 1  
PROCNO 1

F2 - Acquisition Parameters  
Date\_ 20160830  
Time\_ 12.49  
INSTRUM spect  
PROBHD 5 mm PABBO BB-  
PULPROG zg30  
TD 65536  
SOLVENT DMSO  
NS 16  
DS 2  
SWH 12335.526 Hz  
FIDRES 0.188225 Hz  
AQ 2.6563926 sec  
RG 203  
DW 40.533 usec  
DE 20.00 usec  
TE 298.3 K  
DL 1.00000000 sec  
TD0 1

===== CHANNEL f1 =====  
SFO1 600.1337060 MHz  
NUC1 1H  
P1 10.60 usec  
PLW1 27.82500076 W

F2 - Processing parameters  
SI 32768  
SF 600.1300000 MHz  
WDW EM  
SSB 0  
LB 0.30 Hz  
GB 0  
PC 1.00

<sup>13</sup>C NMR spectrum of compound **2o**

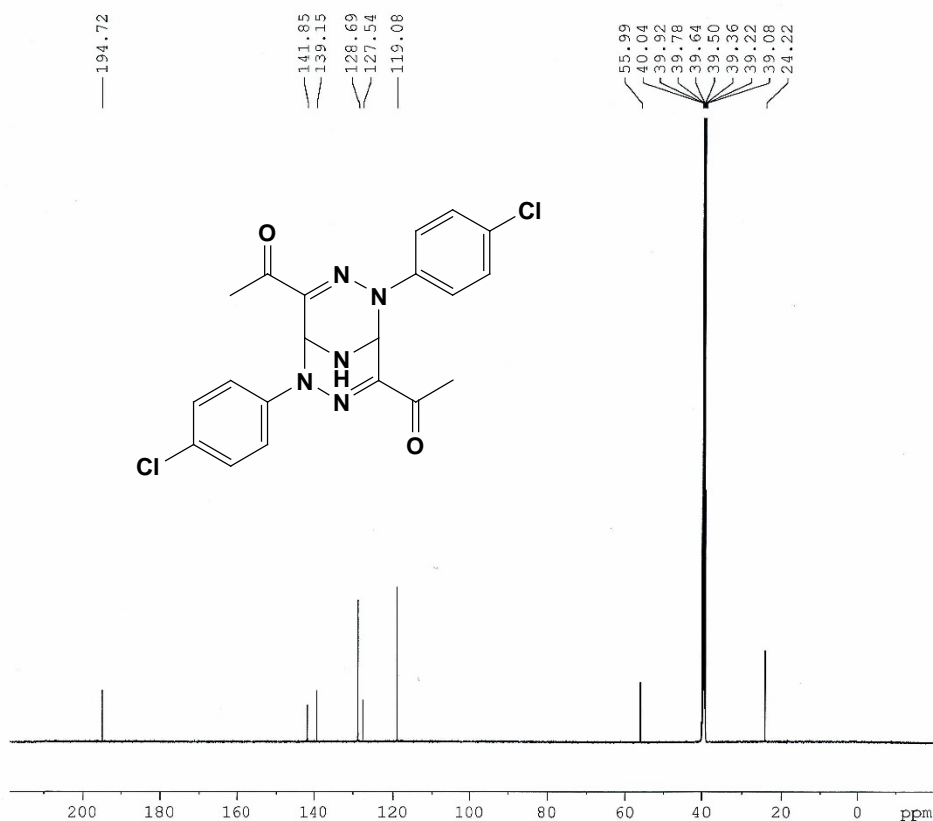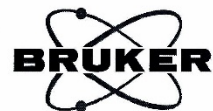

Current Data Parameters  
 NAME 8HW-1H  
 EXPNO 2  
 PROCNO 1

F2 - Acquisition Parameters  
 Date 20160830  
 Time 14.33  
 INSTRUM spect  
 PROBHD 5 mm PABBO BB-  
 PULPROG zgpg30  
 TD 65536  
 SOLVENT DMSO  
 NS 10240  
 DS 4  
 SWH 36057.691 Hz  
 FIDRES 0.550197 Hz  
 AQ 0.9087659 sec  
 RG 203  
 DW 13.867 usec  
 DE 50.00 usec  
 TE 301.2 K  
 D1 2.0000000 sec  
 D11 0.03000000 sec  
 TD0 1

===== CHANNEL f1 =====  
 SFO1 150.9178979 MHz  
 NUC1 13C  
 P1 8.80 usec  
 PLW1 78.13500214 W

===== CHANNEL f2 =====  
 SFO2 600.1324005 MHz  
 NUC2 1H  
 CPDPRG2 waltz65  
 PCPD2 70.00 usec  
 PLW2 27.82500076 W  
 PLW12 0.63804001 W  
 PLW13 0.31264001 W

F2 - Processing parameters  
 SI 32768  
 SF 150.9028893 MHz  
 WDW EM  
 SSB 0  
 LB 1.00 Hz  
 GB 0  
 PC 1.40

<sup>1</sup>H NMR spectrum of compound 2p

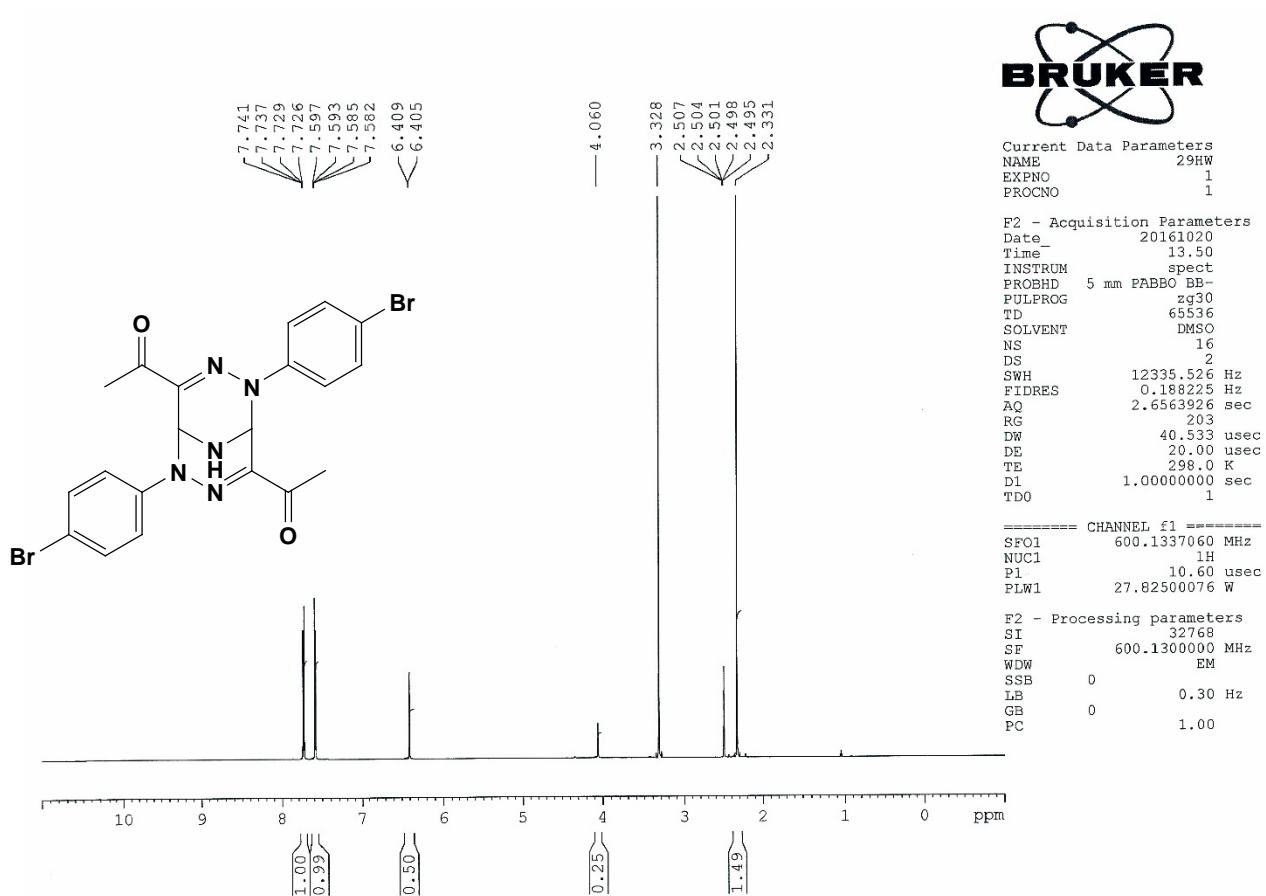

<sup>13</sup>C NMR spectrum of compound 2p

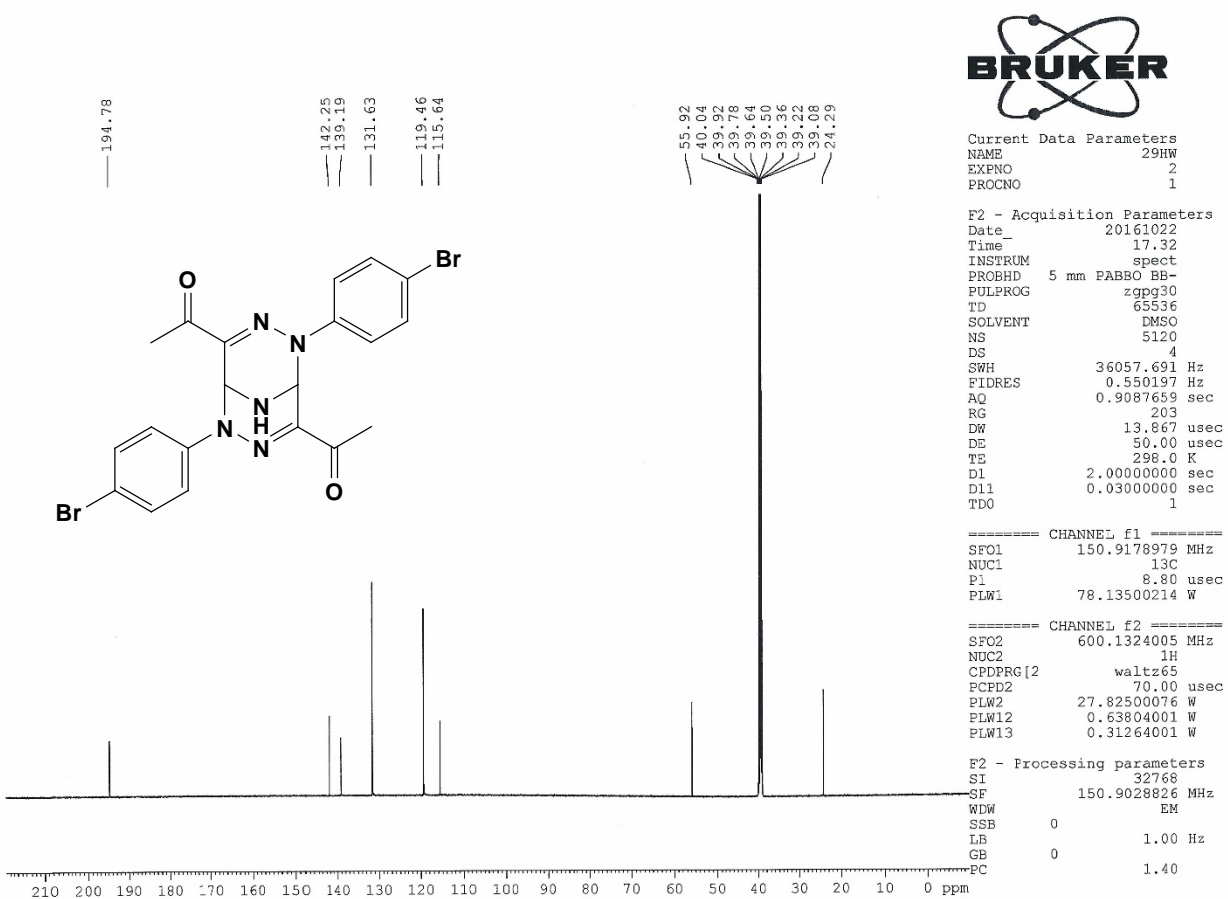

Supplement: molecules-24-01110-s001.pdf [file molecules-24-01110-s001.pdf]
